# Supplementary material for: Drosophila tsRNAs preferentially suppress general translation machinery via antisense pairing and participate in cellular starvation response
Source: Oxford University Press journal article supplement (doi:10.1093/nar/gky189), 2018-03-03
Supplement: gky189_supp.zip [file gky189_supp.zip]

Archive with 2 entries (2 files):
- Luo_tsRNA_SOM_update.pdf
- Table S2.xlsx
