# Supplementary material for: Drosophila tsRNAs preferentially suppress general translation machinery via antisense pairing and participate in cellular starvation response
Source: Oxford University Press journal article supplement (doi:10.1093/nar/gky189), 2018-03-03
Supplement: gky189_supp.zip [file gky189_supp.zip › Luo_tsRNA_SOM_update.pdf]

## Supplementary Methods

### cDNA library constructions for small RNAs and mRNAs

Total RNA was extracted using the TRIzol reagent (Thermo Fisher) and chloroform, and the concentration was determined by NanoDrop (Thermo Fisher). For small RNA libraries, 20~50  $\mu$ g total RNA was analysed on a 15% TBE-Urea gel, and the 18~29 nt band was excised (the ~30 nt 2S rRNA band was avoided with caution). The resolved RNAs were sequentially ligated with 3'-adaptor and 5'-adaptor, and then reverse-transcribed. See Supplementary Table S1 for the sequences of the adaptors. For mRNA libraries, 10~20  $\mu$ g poly(A)+ RNAs were selected on oligo-dT25 DynaBeads (Thermo Fisher) and fragmented at 95°C in fragmentation buffer (2 mM EDTA, 12 mM Na<sub>2</sub>CO<sub>3</sub>, 88 mM NaHCO<sub>3</sub>, pH 9.3). The fragmented RNAs within 40~80 nt were 3'-dephosphorylated, ligated with 3'-adaptor and purified on a 15% TBE-Urea gel. The 3'-ligated RNAs were subsequently 5'-phosphorylated, ligated with 5'-adaptor, and reverse-transcribed. All cDNAs were amplified through 12 PCR cycles, and the products within the correct size ranges were collected from 20% TBE gels for quality tests (Fragment Analyzer, Agilent Technologies) and sequencing (Illumina HiSeq-2500 sequencer; run type: single-end; read length: 50 nt).

### Ribosome profiling of S2 cells

The harvested S2 cells were treated with 100  $\mu$ g/mL cycloheximide (CHX, from Sigma) for 5 min to stop translation, washed using ice-cold PBS containing 100  $\mu$ g/mL CHX, and then lysed in a buffer containing 50 mM Tris, pH 7.5, 150 mM NaCl, 5 mM MgCl<sub>2</sub>, 1% Triton X-100, 2 mM DTT, 20 U/mL SupraseIn (Thermo Fisher), 0.5 tablet of Protease inhibitor (Roche), 100  $\mu$ g/mL CHX, and 100  $\mu$ g/mL emetine (Sigma). The clarified lysates were aliquoted, flash-frozen in liquid nitrogen, and stored at -80°C for future RNA extraction procedures or ribosome footprinting. It has been reported that pre-treating with CHX has an impact on the ribosome footprint profiles after the start codon (1,2). To control this, all our analyses were based on the contrast between the experimental measurements and a side-by-side control measurement.

Lysates with ~400  $\mu$ g total RNA were treated with micrococcal nuclease (3 U/ $\mu$ g RNA) in a buffer containing 50 mM Tris, pH 7.5, 15 mM CaCl<sub>2</sub>, 5 mM MgCl<sub>2</sub>, 1% Triton x-100, 2 mM DTT, 20 U/mL SupraseIn, 0.5 tablet of protease inhibitor, 100  $\mu$ g/mL CHX, and 100  $\mu$ g/mL emetine for 40 min at 25°C. The reaction was quenched by adding EGTA to a final concentration of 6.25 mM. A 10~50% sucrose gradient was prepared in a buffer containing 250 mM NaCl, 50 mM Tris, pH 7.5, 15 mM MgCl<sub>2</sub>, 0.5 mM DTT, 12 U/mL RNaseOUT, 0.5 tablet of protease inhibitor and 20  $\mu$ g/mL emetine using a Gradient Master (Biocomp Instruments) and resolved using a SW-41 rotor (Beckmann Coulter). The monosome fractions were collected, flash-frozen in liquid nitrogen, and stored at -80°C until further use.

SupraseIn was applied throughout the protocol. The resuspended monosomes were digested with 20 mg/mL Proteinase K and 10% SDS at 42°C and were subsequently extracted once using acid phenol and once using phenol/chloroform. The 28~32 nt RNA fragment band was isolated from 15% TBE-Urea gels. To remove the rRNA-derived fragments, the RNAs were treated with Ribo-Zero Gold rRNA Removal Kit (Illumina). The remaining RNAs were sequentially subject to 3'-dephosphorylation, 3'-ligation, 5'-phosphorylation, 5'-ligation, and reverse-transcription. The cDNAs were treated with synthesized biotinylated oligos (Supplementary Table S1) on DynaBeads for further depletion of the rRNA-derived products and were subjected to the same procedures described above.

### Sequence processing and alignment

The FASTX-Toolkit ([http://hannonlab.cshl.edu/fastx\\_toolkit/](http://hannonlab.cshl.edu/fastx_toolkit/)) was applied to clip the 3'-adaptor sequence from reads that had passed purity filtering. After clipping, small RNA-Seq reads within 18~29 nt, mRNA-Seq reads more than 40 nt and Ribo-Seq reads within 27~35 nt were kept. The remaining reads were sequentially mapped to the yeast genome (S288C\_R64.2.1), the *Wolbachia* genome (GenBank), 23 species of insect virus (GenBank), transposons (FlyBase), miscRNA (FlyBase), miRNAs (miRBase) and tRNAs (3), using Bowtie version 1.0.1 (4). The unmapped reads were subsequently aligned with

chromosome arms (FlyBase r6.06) using STAR (5). Antisense (less than 0.1%) and non-unique alignments (less than 1%) for the protein-coding genes were discarded in further quantitative analyses. See Supplementary Table S4 for the summary of the mapping statistics.

### **Quantifications of small RNA, mRNA and RPF expression**

For each the protein-coding gene, the transcript isoform with the longest CDS was used to represent the expression level. The mRNA-Seq reads that were mapped to the exons of these transcripts, and the Ribo-Seq reads that were mapped to the CDSes of these transcripts, were summarized with HTSeq-count (6). For the differential expression analysis, the count data were normalized and analysed using DESeq2 (7), while genes with extremely low expression (< 50 summed reads in all replicates and experiments for each library preparation procedure) were excluded. Significantly regulated genes were considered when  $\log_2$  fold changel > 0.2 and FDR adjusted *P*-value < 0.05. The functional annotation of the significantly regulated genes was obtained using DAVID (<http://david.ncifcrf.gov>).

### **Supplementary References**

1. Gerashchenko, M.V. and Gladyshev, V.N. (2014) Translation inhibitors cause abnormalities in ribosome profiling experiments. *Nucleic Acids Res.*, **42**, e134.
2. Hussmann, J.A., Patchett, S., Johnson, A., Sawyer, S. and Press, W.H. (2015) Understanding biases in ribosome profiling experiments reveals signatures of translation dynamics in yeast. *PLoS Genet.*, **11**, e1005732.
3. Lowe, T.M. and Eddy, S.R. (1997) tRNAscan-SE: a program for improved detection of transfer RNA genes in genomic sequence. *Nucleic Acids Res.*, **25**, 955-964.
4. Langmead, B., Trapnell, C., Pop, M. and Salzberg, S.L. (2009) Ultrafast and memory-efficient alignment of short DNA sequences to the human genome. *Genome Biol.*, **10**, R25.
5. Dobin, A., Davis, C.A., Schlesinger, F., Drenkow, J., Zaleski, C., Jha, S., Batut, P., Chaisson, M. and Gingeras, T.R. (2013) STAR: ultrafast universal RNA-seq aligner. *Bioinformatics*, **29**, 15-21.
6. Anders, S., Pyl, P.T. and Huber, W. (2015) HTSeq--a Python framework to work with high-throughput sequencing data. *Bioinformatics*, **31**, 166-169.
7. Love, M.I., Huber, W. and Anders, S. (2014) Moderated estimation of fold change and dispersion for RNA-seq data with DESeq2. *Genome Biol.*, **15**, 550.

## Supplementary Figures

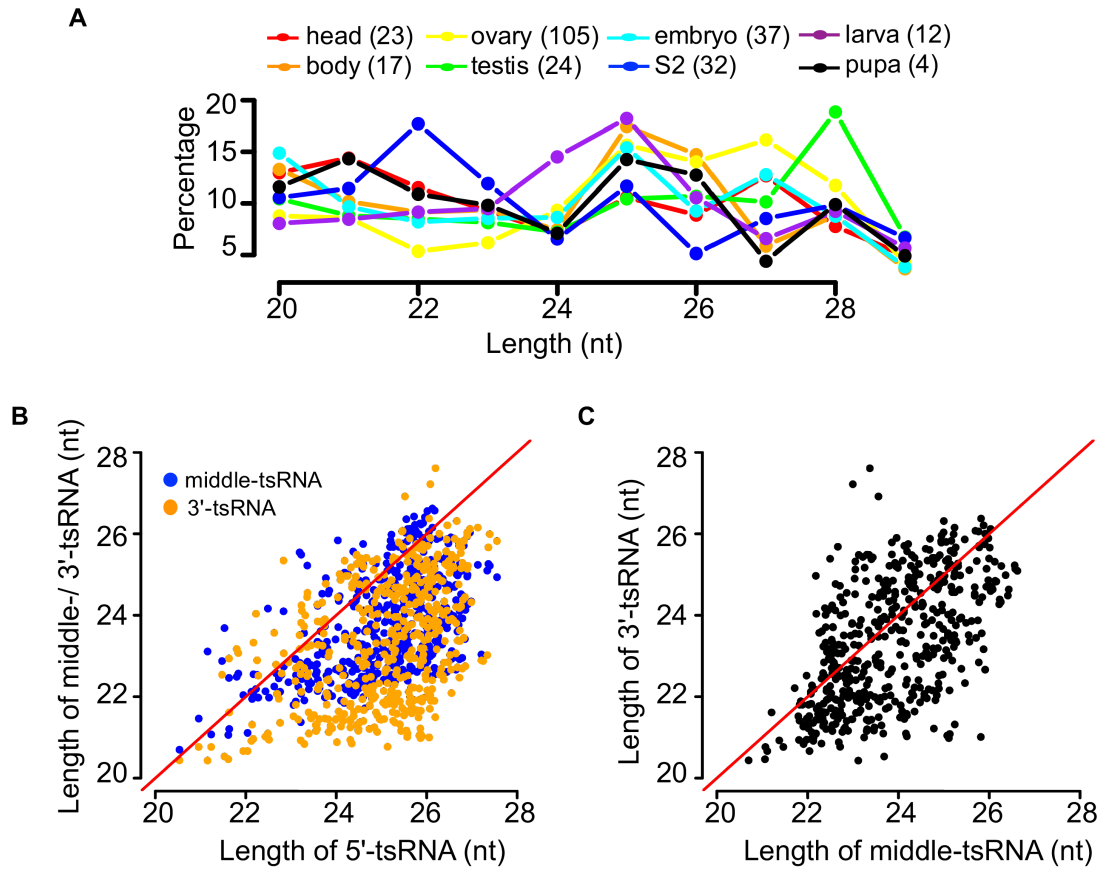

**Figure S1. Length distribution of tsRNAs.**

(A) The distributions of the tsRNA length in different developmental tissue/development stages. The color key represents the percentage (%) of tsRNAs with a certain length in a library. The number of libraries in each type is indicated in parentheses.

(B) The lengths of the 5'-tsRNAs are generally longer than those of the middle-tsRNAs (blue) and 3'-tsRNAs (orange) in a library.

(C) The lengths of the middle-tsRNAs are generally longer than those of the 3'-tsRNAs in a library. The libraries plotted in (B) and (C) are the 495 public libraries listed in Supplementary Table S2.

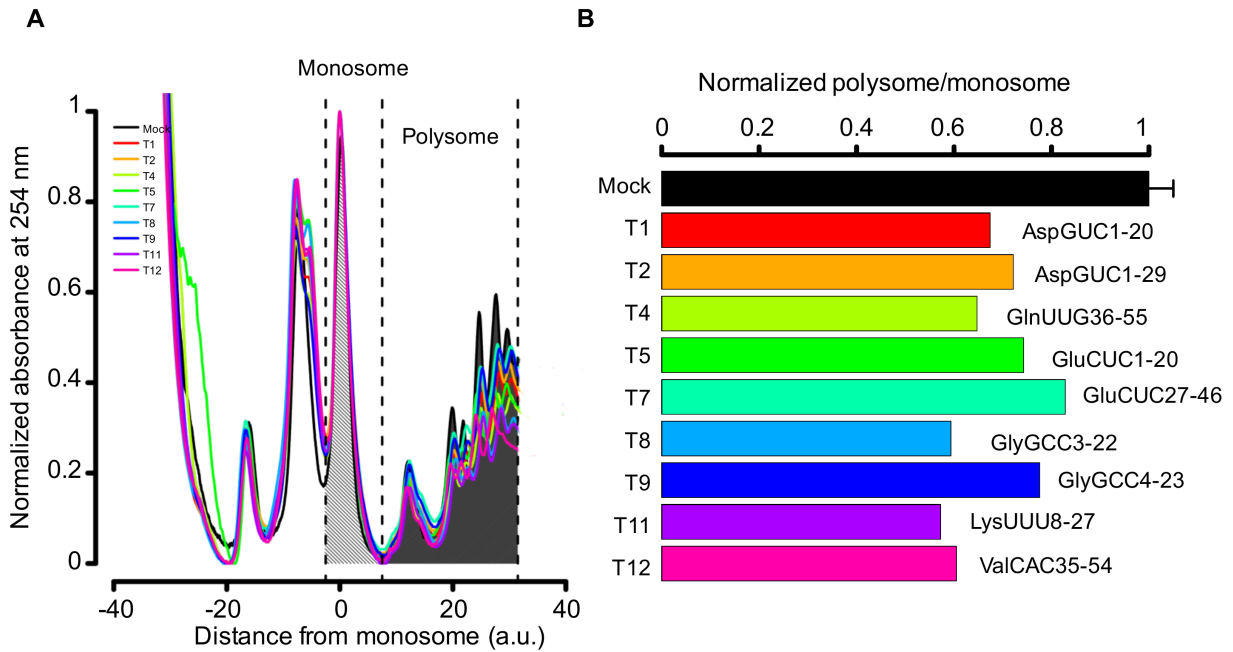

**Figure S2. Transfections of tsRNA mimics into S2 cells repress global translational activities.**

(A) Absorbance profiles (at a UV wavelength of 254 nm) of RNAs partitioned using 10~45% sucrose gradients from S2 cells transfected without any RNA sequence (Mock, black), with different single-stranded tsRNA mimics (T1 to T12, without the three tsRNA mimics in Figure 2B). For each profile, both the absorbance and the position were normalized according to the monosome peak. Dashed lines indicate the boundaries of the monosome and polysome partitions for a measurement of the overall translational activity. Error bars for the Mock represent one standard deviation computed from three repeated experiments.

(B) The ratios of the aggregate intensities within polysome partition (P) to the monosome partition (M) normalized by the median value of the control experiments. For each cellular transfection experiment, the ID of each tsRNA is given to the left of the plot, and the start and end positions of the tsRNA on the source tRNA were given to the right of the bar plot.

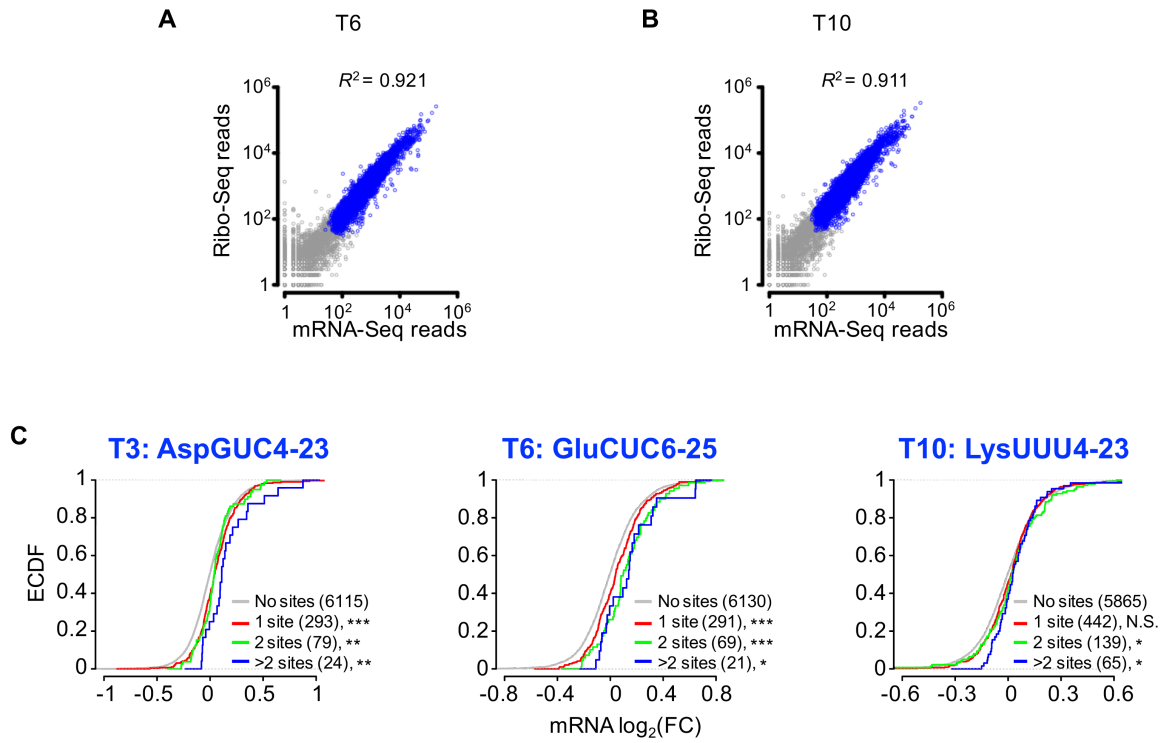

**Figure S3. tsRNAs transfected into S2 cells repress mRNAs with conserved target sites.**

(A-B) Scatter plots of the Ribo-Seq read counts against the mRNA-Seq read counts of individual genes in T6 (A) and T10 (B) transfection experiments. Blue circles represent genes that have > 50 mRNA-Seq reads and >50 Ribo-Seq reads.

(C) Cumulative distribution of gene expression changes in mRNA. The  $x$ -axis is the  $\log_2(FC_{mRNA})$  of mRNA in S2 cells transfected with the tsRNA mimic (T3, T6, T10 from left to right) versus transfection with ss-NC. The genes with 7-mer sites conserved between *D. melanogaster* and *D. virilis* and antisense paired to any part of a tsRNA are defined as tsRNA target genes. Red: genes with one conserved tsRNA target site, Green: genes with two conserved tsRNA target sites, Blue: genes with more than two conserved tsRNA target sites, Grey: genes without any target site of the transfected tsRNA in the entire mRNA. The number of genes in each category is indicated in parentheses. The asterisks indicate a significant difference in mRNA fold change compared with the ss-NC control group. \*,  $P < 0.05$ ; \*\*,  $P < 0.01$ ; \*\*\*,  $P < 0.001$ , N.S. not significant.

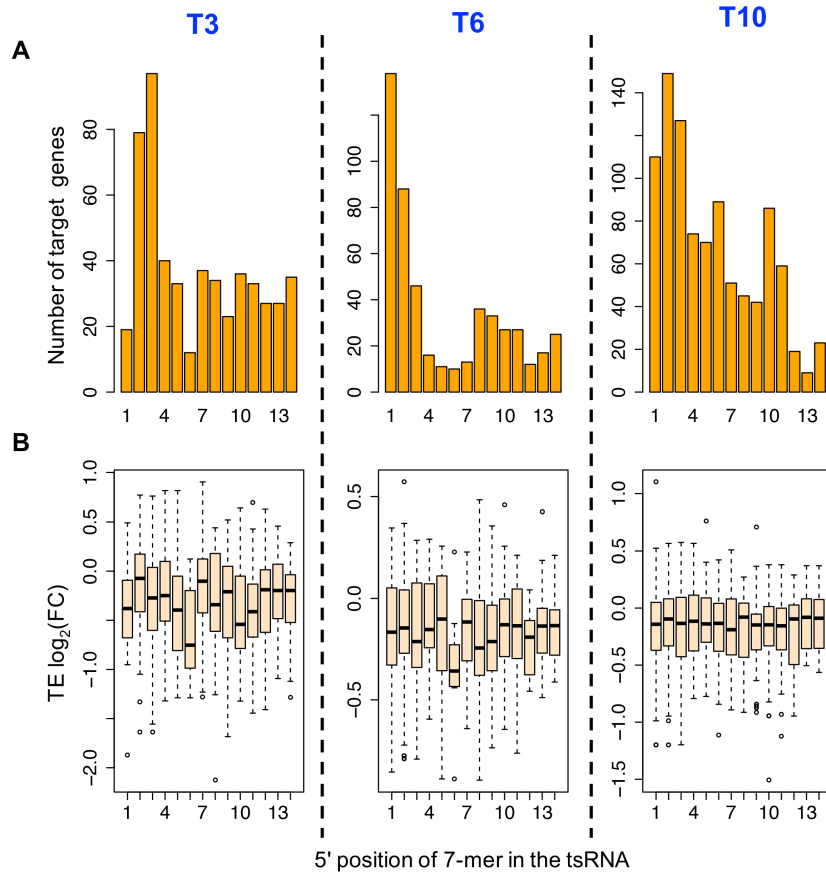

**Figure S4. tsRNAs transfected into S2 cells repress mRNAs with conserved target sites.**

(A) The number of conserved 7-mer target sites antisense pairing to different regions of a tsRNA. For each target site, the starting position of pairing in the tsRNA was shown. From left to right, T3, T6, and T10.

(B) Changes of TEs for target genes with complementary sites of 7-mers starting from different positions of tsRNA. From left to right, T3, T6, T10 transfection.

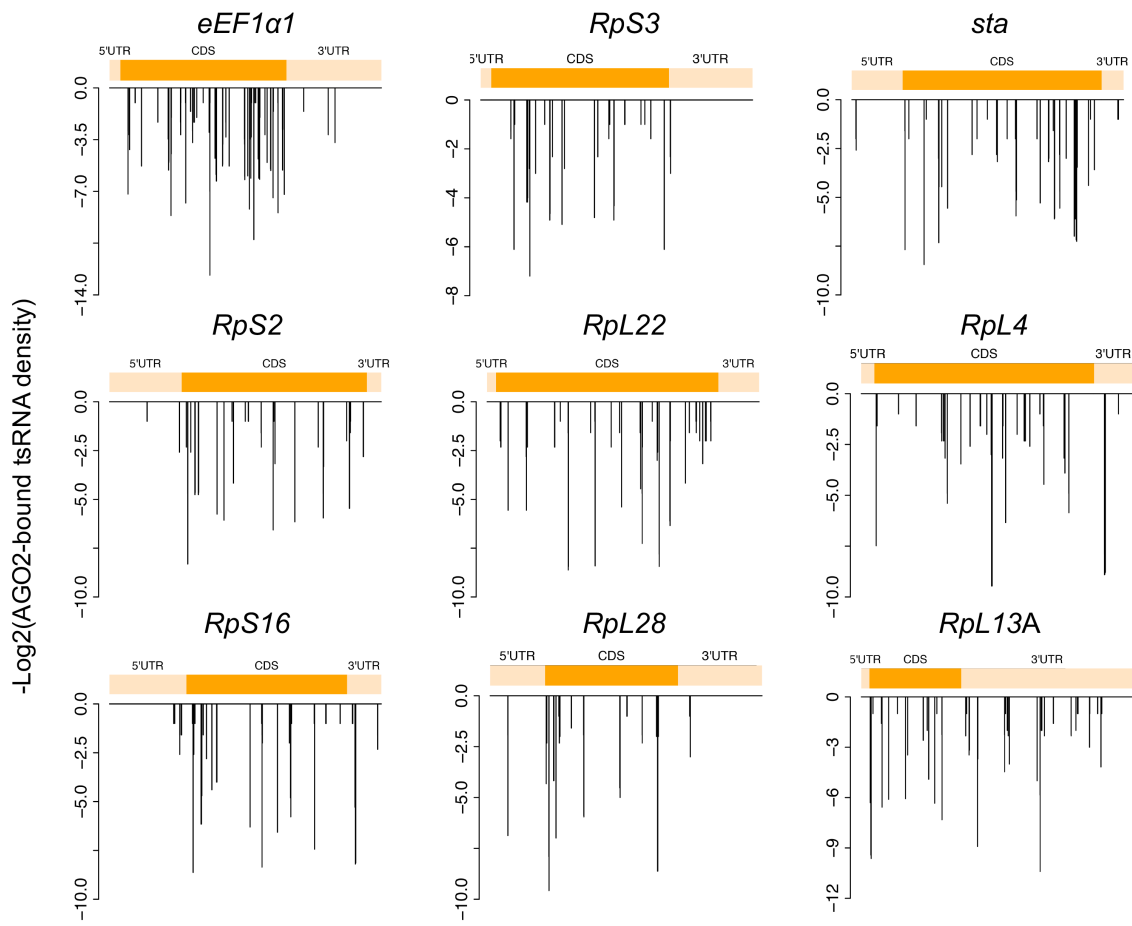

**Figure S5.** The density of conserved target sites of the AGO2-bound tsRNAs on representative mRNAs. The y-axis is the  $-\log_2$  (reads of AGO2-bound tsRNAs) for each target site.

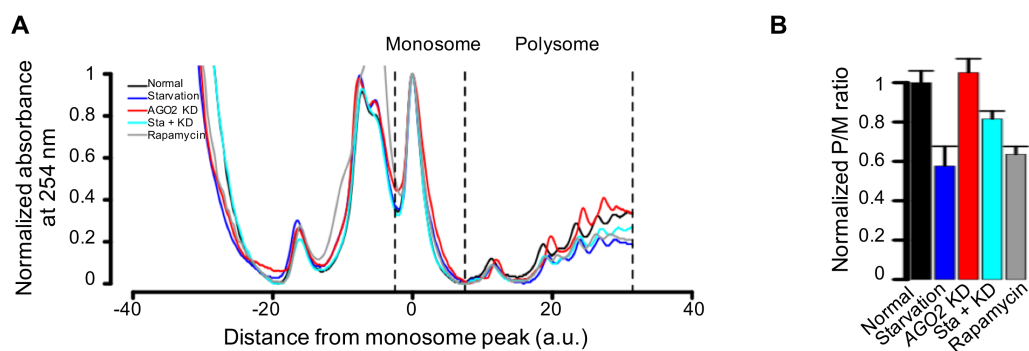

**Figure S6. The polysome profile analysis for RNAs in S2 cells under different conditions.**

(A) The polysome profiles for RNAs in S2 cells under the conditions of normal culture (black), serum starvation (blue), *AGO2* knockdown (red), *AGO2* knockdown while serum deprived (cyan), and rapamycin treatment (grey).

(B) The relative P/M ratios measured from S2 cells under different conditions as in (A). Error bars represent one standard deviation computed from three repeated experiments.

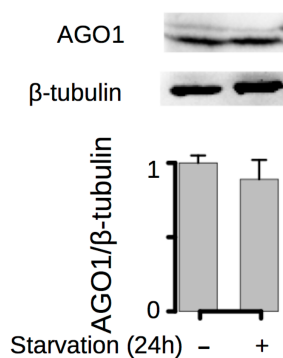

**Figure S7. Level of AGO1 remains similar after starvation in S2 cells.** Western blotting shows no significant difference in the level of AGO1 proteins after 24 hours culturing in the serum-free medium. Error bars represent one standard deviation computed from two repeated experiments.

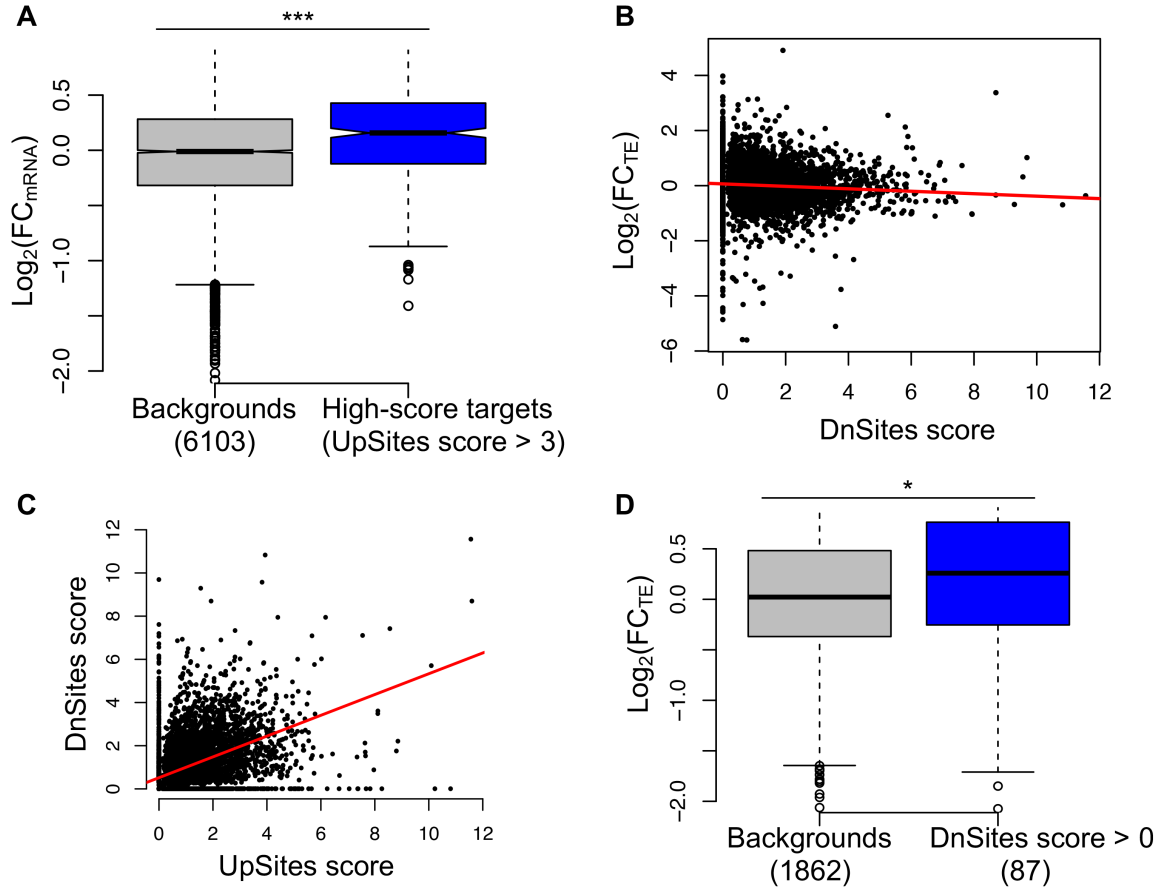

**Figure S8. Changes of mRNA levels and TEs for genes targeted by the up-regulated or down-regulated tsRNAs under cellular starvation.**

(A) The mRNAs of the highest scoring target genes (UpSites score > 3) were significantly up-regulated compared to those of the background genes in the starved S2 cells. \*\*\*,  $P < 0.001$ .

(B) A significantly negative correlation between the  $\text{FC}_{\text{TE}}$  ( $\log_2$  scaled, y-axis) and the DnSites score for a mRNA under starvation ( $\rho = -0.075$ ,  $P = 1.2 \times 10^{-9}$ ).

(C) The UpSites and DnSites scores for a mRNA were highly correlated ( $\rho = 0.478$ ,  $P < 10^{-16}$ ).

(D) Among the mRNAs without any sites of the up-regulated tsRNAs (UpSites = 0), the target mRNAs of the down-regulated tsRNAs had significantly higher TEs compared to the remaining mRNAs. \*,  $P < 0.05$ .

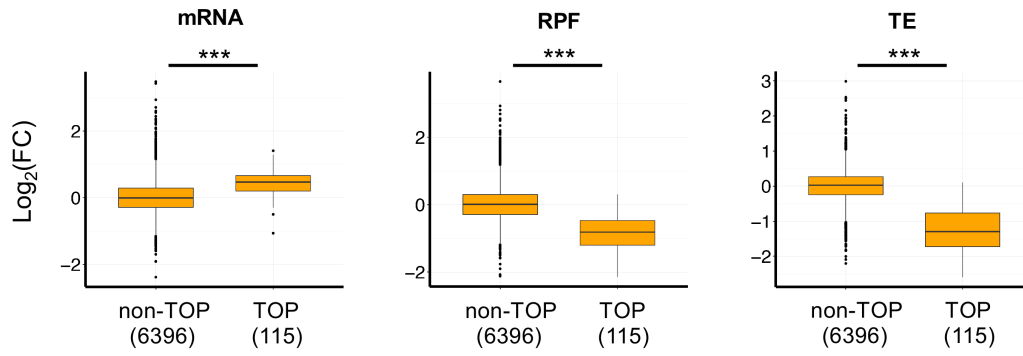

**Figure S9.** The  $\log_2(\text{FC})$  of mRNA, RPF and TE after rapamycin treatment in S2 cells. The number of genes in each category is indicated in parentheses. \*\*\*,  $P < 0.001$ .

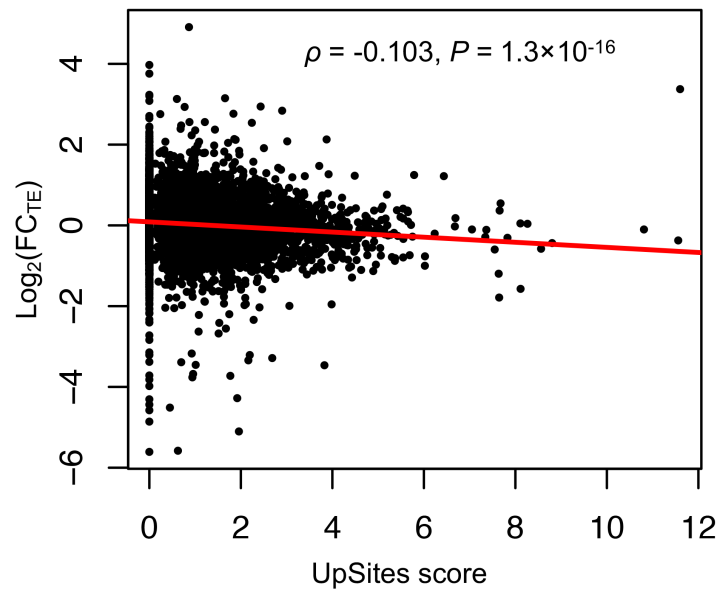

**Figure S10.** A significantly negative correlation between  $\text{FC}_{\text{TE}}$  ( $\log_2$  scaled) and the UpSites score for a mRNA under starvation (the 5'TOP genes were removed).

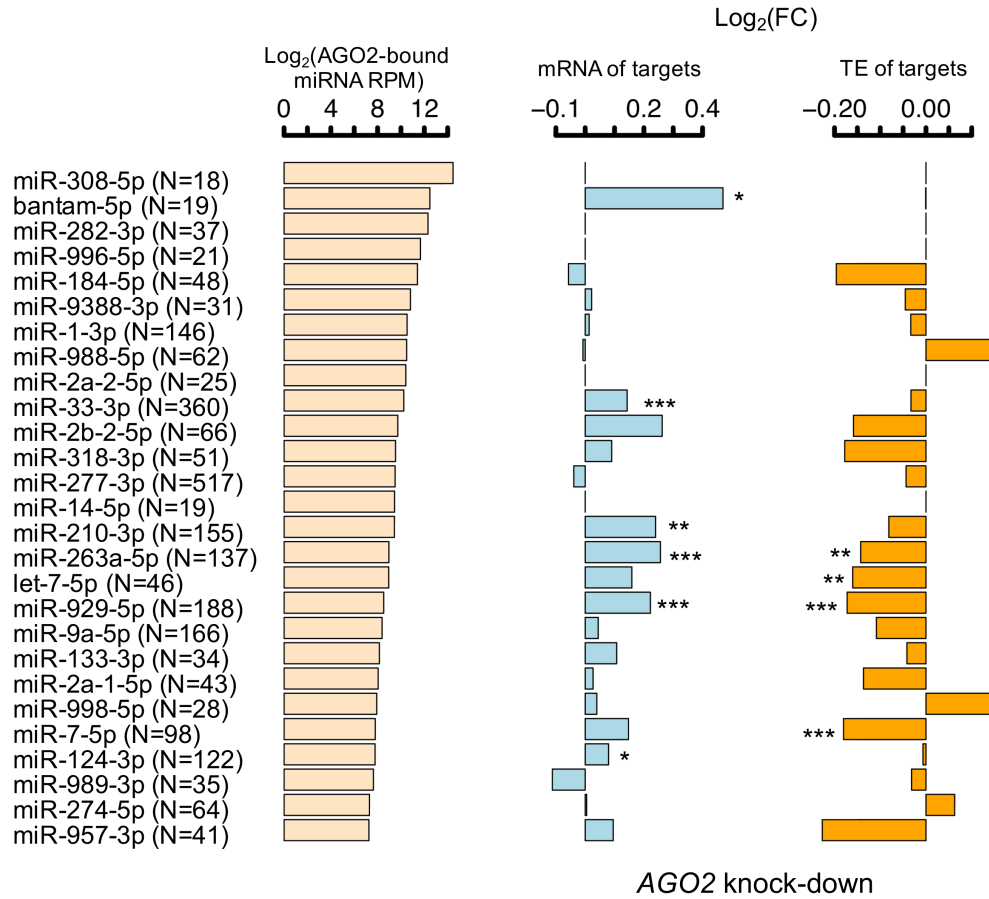

**Figure S11. The change of expression for target genes of the AGO2-bound miRNAs in AGO2 knock-down S2 cells.** The AGO2-bound miRNAs are preferentially bound with AGO2 rather than AGO1 in IP-Seq experiments. The number of target genes in each miRNA is indicated in parentheses. \*,  $P < 0.05$ ; \*\*,  $P < 0.01$ ; \*\*\*,  $P < 0.001$ .

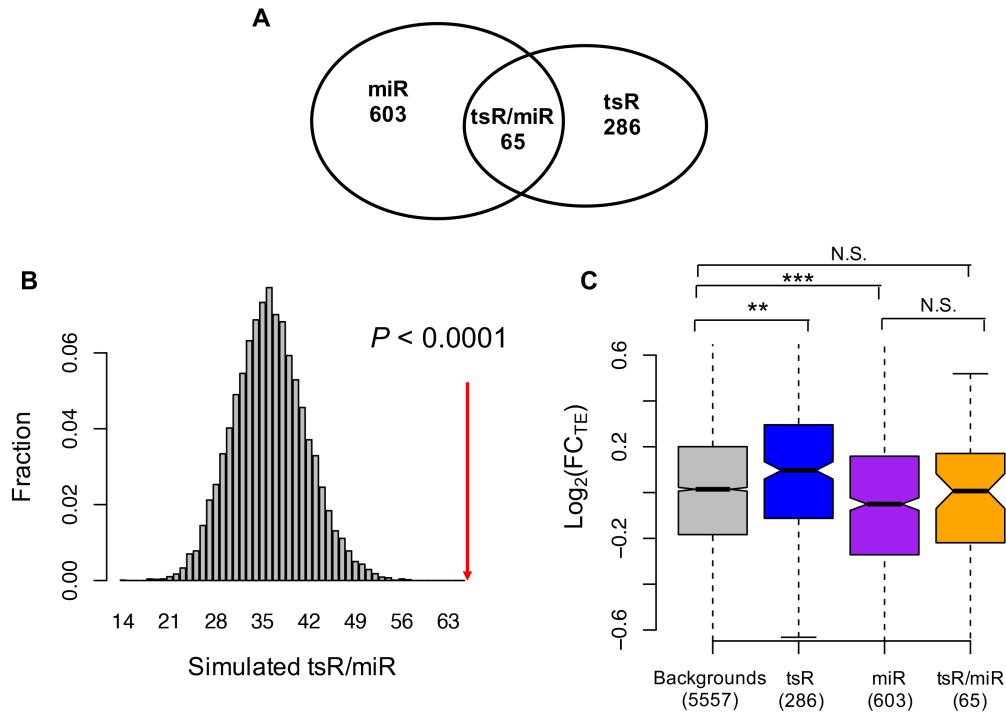

**Figure S12. The overlapping of target genes of the tsRNAs and AGO2-bound miRNAs in normal S2 cells.**

(A) The overlap between targets of AGO2-bound tsRNA and targets of AGO2-bound miRNA. tsR: mRNAs with conserved target sites of AGO2-bound tsRNAs with the density  $> 1.5$  per kb of mRNA; “miR”: the conserved canonical target sites of the AGO2-bound miRNAs in S2 cells.

(B) The observed number of mRNAs that were targeted by the miRNAs and tsRNAs (65, red) and the simulated number of target mRNAs shared between miRNAs and tsRNAs (*x-axis*). In each round of simulation, the observed numbers of miRNA targets and tsRNA targets were randomly sampled from the genes expressed in S2 cells (6,511 genes) respectively, and then the number of targets overlapped between the two sets were counted. The simulation was replicated for 10,000 replicates.

(C) The  $\log_2(\text{FC})$  of TE (*y-axis*) for genes in the AGO2 knock-down S2 cells. “tsR” represents mRNAs only with strong target sites of AGO2-bound tsRNAs; “miR” represents mRNAs only with AGO2-bound miRNAs target sites; “tsR/miR” represents genes with both strong target sites of AGO2-bound tsRNA and target sites of AGO2-bound miRNAs; “backgrounds” means the remaining genes expressed in S2 cells. The number of genes in each category is indicated in parentheses. \*\*,  $P < 0.01$ ; \*\*\*,  $P < 0.001$ ; N.S. not significant.

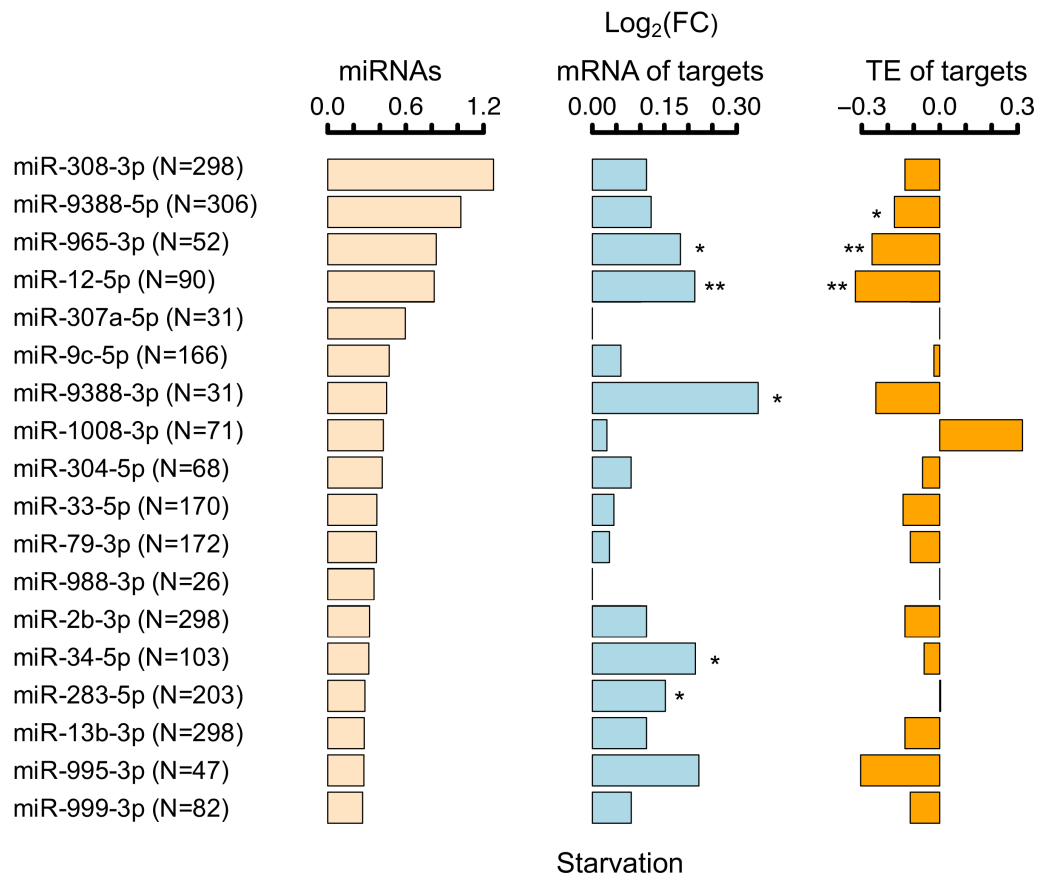

**Figure S13. The miRNAs up-regulated in the starved relative to the normal S2 cells, and the log<sub>2</sub>(FC) for mRNAs and TEs of the conserved target genes.** The 18 up-regulated miRNAs have expression change > 1.2 folds in the starved S2 cells. The number of conserved target genes in each miRNA is indicated in parentheses. \*,  $P < 0.05$ , \*\*,  $P < 0.01$ .

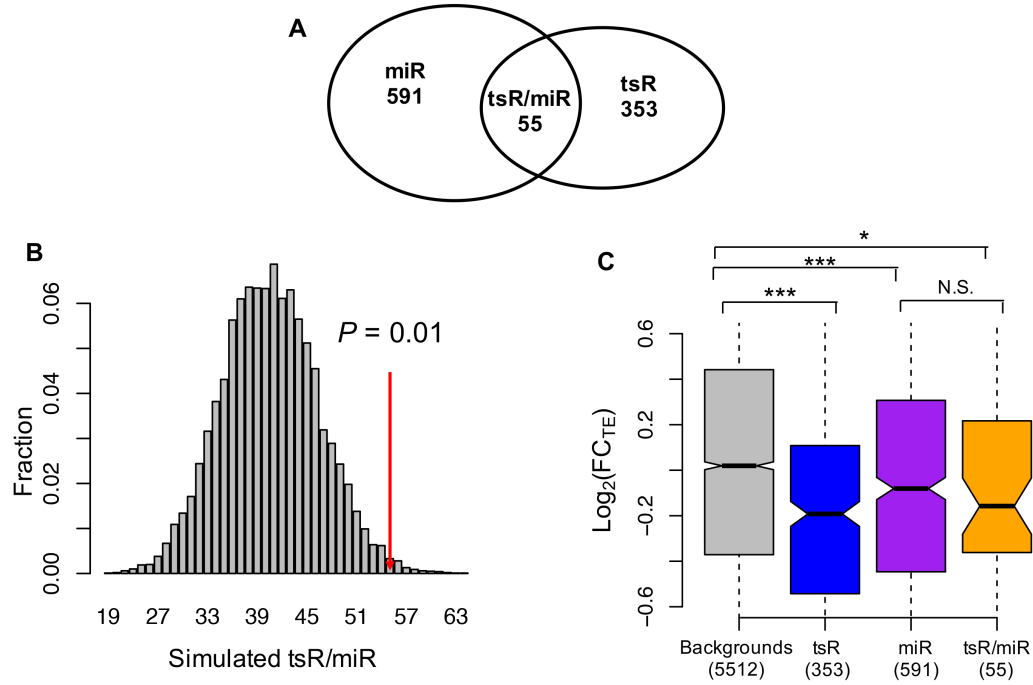

**Figure S14. The overlapping of target genes of the up-regulated tsRNAs and AGO2-bound miRNAs in the starved S2 cells.**

(A) The overlap between targets of AGO2-bound tsRNA and targets of AGO2-bound miRNAs that were up-regulated under starvation. tsR: mRNAs of the up-regulated tsRNAs with UpSites score > 3 but not targeted by the up-regulated miRNAs; “miR”: the conserved canonical target sites of the AGO2-bound miRNAs in S2 cells that were not targeted by the up-regulated tsRNAs. tsR/miR: mRNAs targeted by both the up-regulated tsRNAs and miRNAs.

(B) The observed number of mRNAs that were targeted by the up-regulated miRNAs and tsRNAs (55, red) and the simulated number of target mRNAs shared between the up-regulated miRNAs and tsRNAs (*x-axis*). In each round of simulation, the observed numbers of miRNA targets and tsRNA targets were randomly sampled from the genes expressed in S2 cells (6,511 genes) respectively, and then the number of targets overlapped between the two sets were counted. The simulation was replicated for 10,000 replicates.

(C) The  $\log_2(\text{FC}_{\text{TE}})$  of TE (*y-axis*) for genes in the AGO2 knock-down S2 cells. “backgrounds” means the remaining genes expressed in S2 cells after excluding the tsR, miR and tsR/miR. The number of genes in each category is indicated in parentheses. \*,  $P < 0.05$ ; \*\*\*,  $P < 0.001$ ; N.S. not significant.

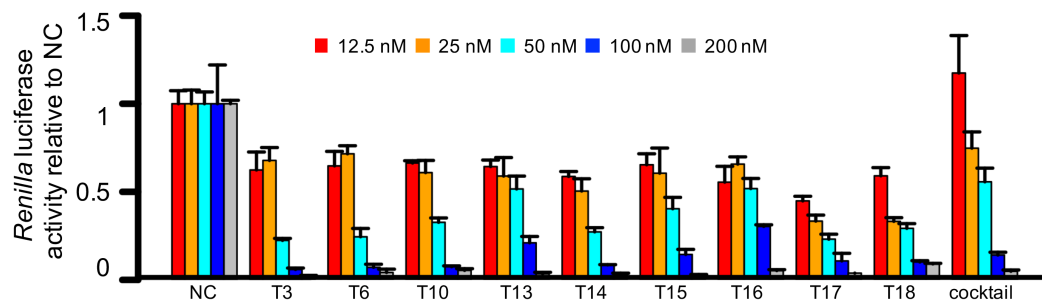

**Figure S15. Co-transfection of tsRNA mimics and the psiCHECK-2 plasmids into S2 cells reduced the activities of *Renilla luciferase*.** The color key shows different final concentrations of tsRNA mimics. The tsRNA cocktail was made by mixing equal amount of the nine tsRNA mimics of the same concentrations. The luciferase activity of S2 cells transfected with the tsRNA mimics were normalized by those transfected with ss-NC at the same concentration (three replicates were performed for each assay).

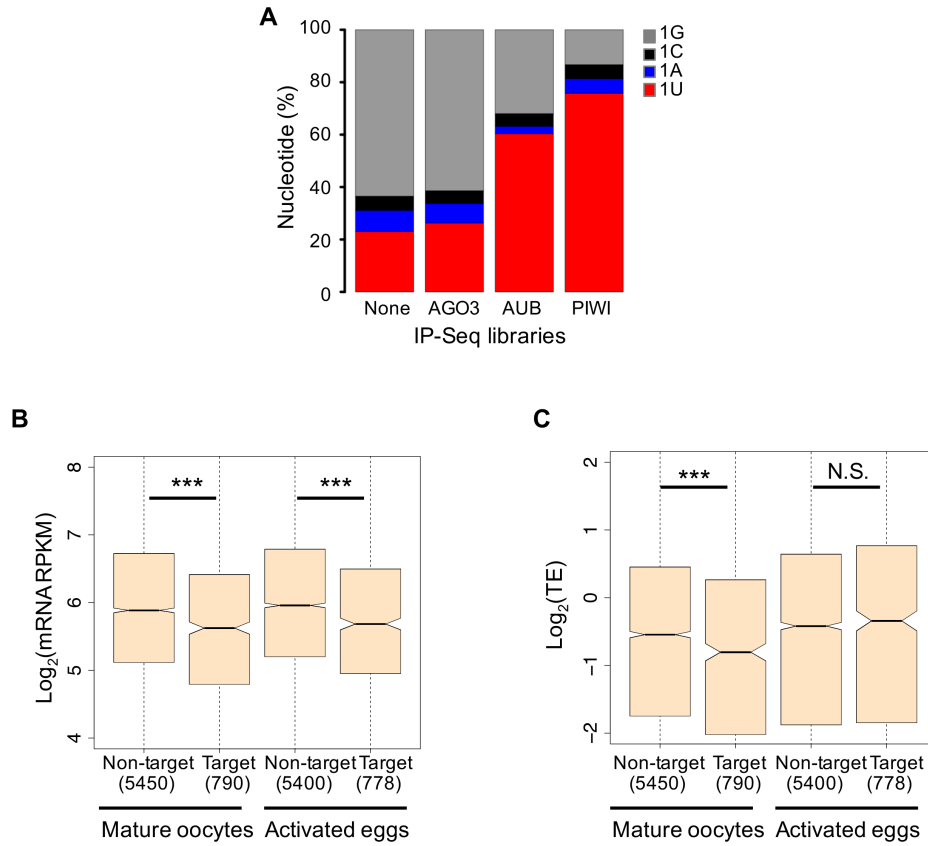

**Figure S16. Predicted targets of the long tsRNAs have reduced mRNA and TEs in mature oocytes and activated eggs.**

(A) Composition of the first nucleotide in tsRNAs that were detected in wildtype and not-treated libraries (None,  $N = 51$ ), AGO3 ( $N = 12$ ), AUB ( $N = 13$ ) and PIWI-IP libraries ( $N = 31$ ) of the *Drosophila melanogaster* ovaries.

(B-C) The log<sub>2</sub> mRNA RPKM and TE of non-target genes and target genes of long tsRNAs. RNAhybrid was used to search for target sites that were complementary to the nucleotides 2-11 of the AUB-bound tsRNAs. The mRNA and Ribo-Seq datasets of mature oocytes and activated eggs were taken from I. Kronja, *et. al.* 2014 to calculate TE for each gene. The number of genes in each category is indicated in parentheses. \*,  $P < 0.05$ , \*\*,  $P < 0.01$ , \*\*\*,  $P < 0.001$

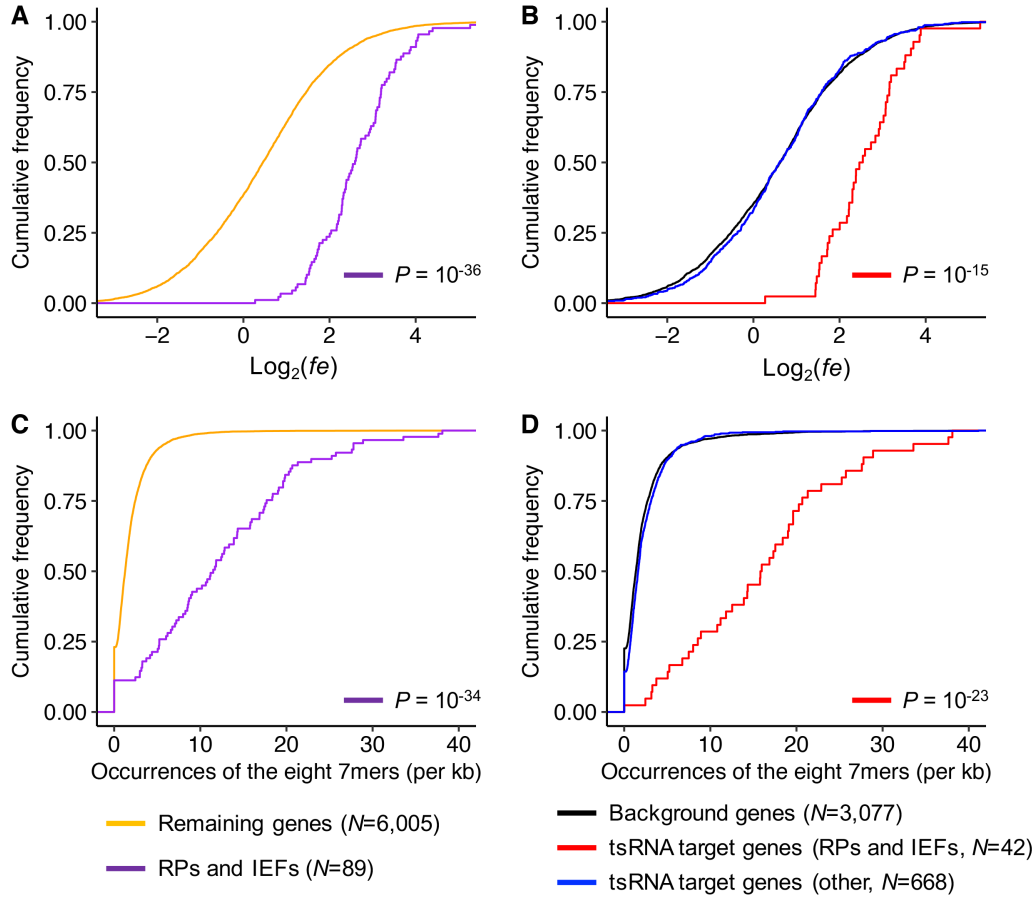

**Figure S17. The fold enrichment ( $fe$ ) of mRNAs of RPs/IEFs in AGO2 CLIP-Seq of nuclear extracts from *Drosophila* S2 cells.**

(A) RPs/IEFs (purple) have significantly higher  $\log_2(fe)$  scores than the remaining expressed genes ( $\text{RPKM} \geq 1$ , orange). A higher  $fe$  score means the mRNA is more enriched in the AGO2 CLIP-Seq data.

(B) The cumulative frequency of  $\log_2(fe)$  scores for the target genes of tsRNAs (the density of tsRNA target site  $> 1$  per kb of mRNA) and background genes (the density of tsRNA target sites  $< 0.5$  per kb of mRNA). Among the target genes, RPs/IEFs ( $N = 42$ , red) have significantly higher  $fe$  scores than the background genes.

(C) RPs/IEFs (purple) have significantly higher densities of the eight 7-mer motifs than the remaining expressed genes ( $\text{RPKM} \geq 1$ , orange). In a gene, the occurrences of each of the eight motifs in CDS are summed and then normalized by the length of the CDS.

(D) The cumulative frequency of the occurrences of the eight 7-mers per kb for gene categories shown in (B).

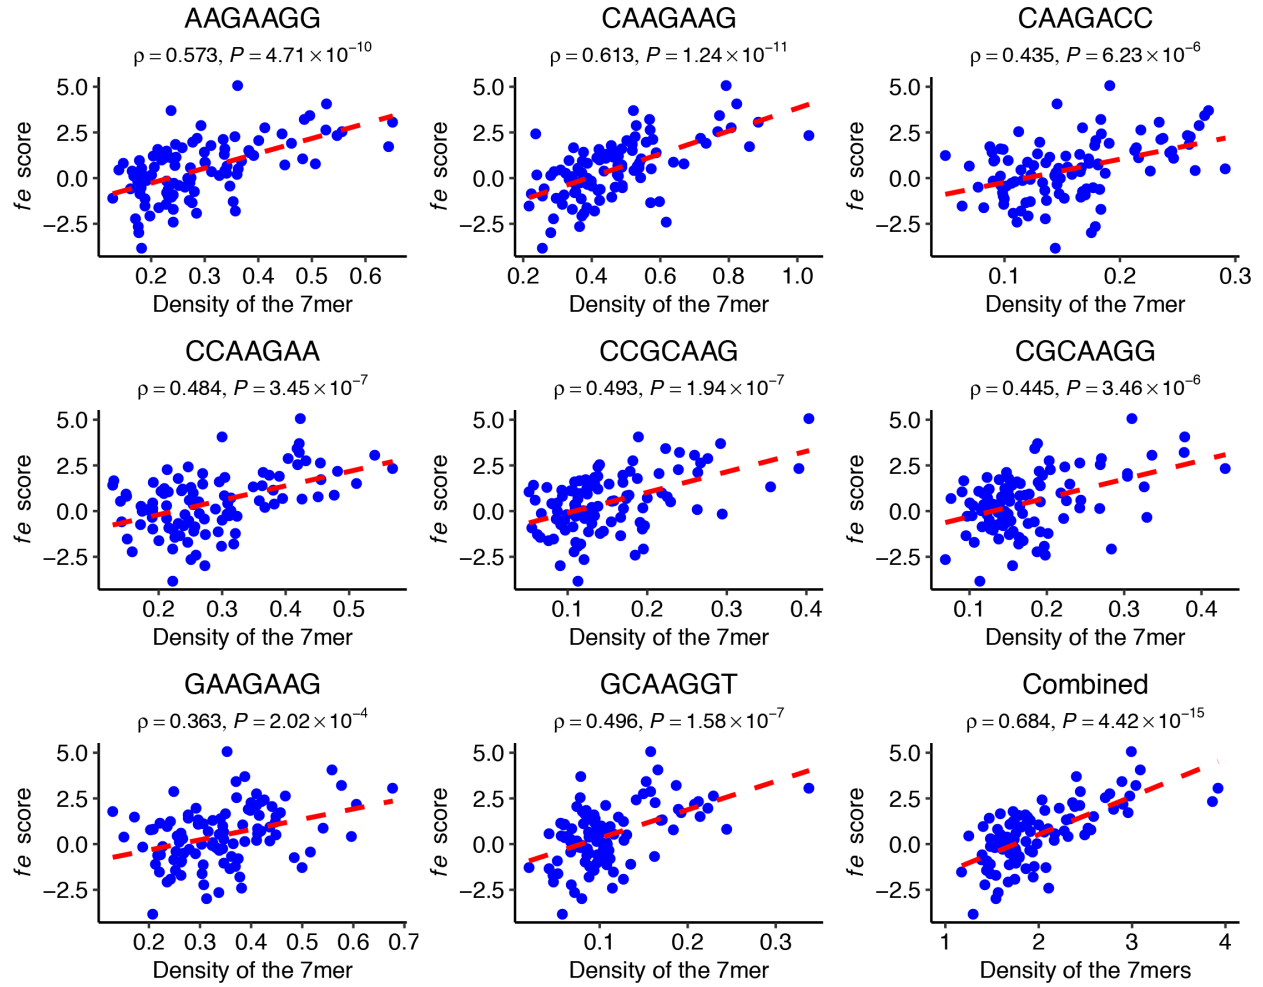

**Figure S18.** The density of the 7-mer motifs in the CDS regions (per kb, x-axis) is significantly positively correlated with the *fe* scores (y-axis,  $\log_2$  scaled) of the mRNAs in the AGO2 CLIP-Seq data. The genes were grouped into 100 bins based on increasing densities of the 7-mer motif. In each bin, the mean *fe* score is calculated and used in the correlation analysis. Combined: the occurrences of the eight 7-mer motifs in a CDS were summed and normalized by the length of the CDS.

## Supplementary Tables

**Table S1.** Oligomer sequences in this study

| <b>ID</b>                                   | <b>Oligo sequence (5'-3')</b>       |
|---------------------------------------------|-------------------------------------|
| <b>Negative control (NC)</b>                |                                     |
| Single-stranded                             | UUCUCCGAACGUGUCACGUUU               |
| Double-stranded                             |                                     |
| guide strand                                | UUCUCCGAACGUGUCACGUUU               |
| passenger strand                            | ACGUGACACGUUCGGAGAAUU               |
| <b>Adaptors used for library generation</b> |                                     |
| 3' adaptor                                  | TGGAATTCTCGGGTGCCAAGG               |
| 5' adaptor                                  | GUUCAGAGUUCUACAGUCCGACGAUC          |
| <b>Oligos for removal of rRNA</b>           |                                     |
| Dro-01                                      | ATGTATGTAAGCGTATTACCGGTGG           |
| Dro-02                                      | GCTTGGACTACATATGGTTGAGGGTTGTA       |
| Dro-03                                      | ATGTAAGTGGAGCCGTACCTGTTGGTTTGTCCC   |
| Dro-04                                      | AGTTACGTAGCCAATTGTGGAACTTTCTTGCT    |
| Dro-05                                      | CATTGTAATCTATTAGCATATACCAAATTT      |
| Dro-06                                      | TGATAAAGTGCTGATAGATTTATATGATTA      |
| Dro-07                                      | GCTAATTAACACAATCCCGGCGTTCTAT        |
| Dro-08                                      | ACGACAATGGATGTGATGCCAATGTAATTT      |
| Dro-09                                      | GGTTGAACTCTAGATAACATGCAGATCGTA      |
| Dro-10                                      | TTTGATGCAAGCTTCTTGATCAAAGTATCACGAGT |
| Dro-11                                      | TGCATTGTATGGCTTCTAAACCATTAAAGTTTAT  |
| Dro-12                                      | CTTGGACTACATATGGTTGAGGGTTG          |
| Dro-13                                      | TTGGACTACATATGGTTGAGGG              |
| Dro-14                                      | ATTAGGCTAAAACCAAGCGATCGCAAGATCG     |
| Dro-15                                      | ACAACCTCAACTCATATGGGACTACCCCCTGA    |
| Dro-16                                      | ACGATGCCAGCTAGCAATTGGGTGTAGC        |
| Dro-17                                      | TTGCCAAAGATGTTTTTCATTAATCAAGAACGA   |
| Dro-18                                      | ATAACTGTGGTAATTCTAGAGCTAATACAT      |
| Dro-19                                      | AACTCTAAGCGGTGGATCACTCGGCTCATGGG    |
| Dro-20                                      | AGGTCGTATCCGTGCTGGACTGCAATGATAA     |
| Dro-21                                      | CATTGTGATGGCCCTAGCGGGTGTTGACACAA    |
| Dro-22                                      | TGTGCTTTTATTAGGCTAAAACCAAGCG        |

**Table S2:** A summary of the 495 publicly available deep-sequencing libraries of small RNAs. See the excel file Table S2.xlsx

**Table S3.** Synthetic tsRNA sequences that were used to transfect S2 cells.

| ID  | tsRNA       | Sequence (5'-3')              | total reads | AGO1-IP | AGO2-IP |
|-----|-------------|-------------------------------|-------------|---------|---------|
| T1  | AspGUC1-20  | UCCUCGAUAGUAUAGUGGUU          | 7028730     | 10      | 106     |
| T2  | AspGUC1-29  | UCCUCGAUAGUAUAGUGGUUAGUAUCCCC | 1962792     | 2       | 21      |
| T3  | AspGUC4-23  | UCGAUAGUAUAGUGGUUAGU          | 348507      | 2       | 4       |
| T4  | GlnUUG36-55 | GAAUCCAGCGAUCCGAGUUC          | 12376       | 13      | 162     |
| T5  | GluCUC1-20  | UCCCAUAUUGUCUAGUGGUU          | 11718113    | 0       | 3       |
| T6  | GluCUC6-25  | UAUUGUCUAGUGGUUAGGAU          | 111766      | 0       | 2       |
| T7  | GluCUC27-46 | UCCGGCUCUCACCCGGGAGG          | 675         | 0       | 0       |
| T8  | GlyGCC3-22  | AUCGGUGGUUCAGUGGUAGA          | 6215393     | 3       | 1       |
| T9  | GlyGCC4-23  | UCGGUGGUUCAGUGGUAGAA          | 354123      | 4       | 8       |
| T10 | LysUUU4-23  | CGGAUAGCUCAGUCGGUAGA          | 277609      | 0       | 2       |
| T11 | LysUUU8-27  | UAGCUCAGUCGGUAGAGCAU          | 152529      | 18      | 1       |
| T12 | ValCAC35-54 | ACACGCACAAGGUCCCCGGU          | 10325       | 1       | 41      |

Each tsRNA is denoted by the start and end positions on the mature tRNA, which is specified by the amino acid it carries and the anti-codon it utilizes. Total reads are calculated from all the public small RNA libraries of *D. melanogaster* (N = 457). Shown also are the read counts in two AGO1-IP (GSM280088 and SRR768820) and corresponding two AGO2-IP small RNA libraries of S2 cells (GSM280087 and SRR768821).

**Table S4** Mapping statistics of the mRNA-Seq and Ribo-Seq experiments

| type                     | condition                   | clean reads | reads mapped to genome |
|--------------------------|-----------------------------|-------------|------------------------|
| starvation treatment     |                             |             |                        |
| mRNA-seq                 | normal                      | 30771296    | 17255091               |
| mRNA-seq                 | starvation                  | 48638217    | 5175823                |
| ribo-seq                 | normal                      | 33371505    | 21670364               |
| ribo-seq                 | starvation                  | 26395905    | 22490933               |
| small RNA seq            | normal                      | 10884480    | 9161200                |
| small RNA seq            | starvation                  | 11107067    | 9822937                |
| <i>AGO2</i> knockdown    |                             |             |                        |
| mRNA-seq                 | ds-NC transfection          | 32667521    | 22809027               |
| mRNA-seq                 | <i>AGO2</i> KD              | 18092742    | 11431529               |
| mRNA-seq                 | starvation + <i>AGO2</i> KD | 15525179    | 9684257                |
| ribo-seq                 | ds-NC transfection          | 55578816    | 24713009               |
| ribo-seq                 | <i>AGO2</i> KD              | 65922080    | 33578587               |
| ribo-seq                 | starvation + <i>AGO2</i> KD | 64430727    | 43746247               |
| rapamycin treatment      |                             |             |                        |
| mRNA-seq                 | DMSO                        | 14708114    | 5939807                |
| mRNA-seq                 | rapamycin treatment         | 14556550    | 6461919                |
| ribo-seq                 | DMSO                        | 75758596    | 47194822               |
| ribo-seq                 | rapamycin treatment         | 76611149    | 48465584               |
| tsRNA mimic transfection |                             |             |                        |
| mRNA-seq                 | ss-NC transfection          | 17860492    | 8335013                |
| mRNA-seq                 | T3 transfection             | 16597319    | 7213055                |
| mRNA-seq                 | T6 transfection             | 16599633    | 8078531                |
| mRNA-seq                 | T10 transfection            | 19076124    | 8496949                |
| ribo-seq                 | ss-NC transfection          | 64813911    | 31081119               |
| ribo-seq                 | T3 transfection             | 47873363    | 38767534               |
| ribo-seq                 | T6 transfection             | 60341814    | 41845666               |
| ribo-seq                 | T10 transfection            | 54744239    | 28539579               |

**Table S5.** Changes of the tsRNA distribution in different genetic backgrounds.

| Mutant                   | 20-22 nt | 23-29 nt | Control                       | 20-22 nt | 23-29 nt | Fold Change |
|--------------------------|----------|----------|-------------------------------|----------|----------|-------------|
| loqsKO/CyO               | 31958    | 183403   | +/+                           | 64858    | 131992   | 0.35        |
| dcr-2 <sup>L811fsX</sup> | 14007    | 75530    | dcr-2 <sup>L811fsX</sup> /CyO | 89719    | 247206   | 0.51        |
| r2d2 <sup>1</sup>        | 37395    | 137360   | r2d2 <sup>1</sup> /CyO        | 12945    | 26457    | 0.56        |
| loqs <sup>f00791</sup>   | 142539   | 285868   | loqs <sup>f00791</sup> /CyO   | 118240   | 182625   | 0.77        |

Libraries that were generated with additional treatments such as immunoprecipitation and oxidization, or datasets that do not have available appropriate control data from the same studies, were not used. We found a large variation in the results between different studies using the RNAi/dsRNA method, so these datasets were not used either. For each pair, the ratio of the 20-22 nt tsRNAs to the 23-29 nt tsRNAs in the mutant library was divided by this ratio in the control library to calculate the fold difference.

**Table S6 5' TOP gene list**

| Gene ID     | Gene Symbol | Ribosomal Protein | Initiation/<br>Elongation Factor? | Source | tsRNA Target? | Rapamycin-treatment<br>log <sub>2</sub> (FC) |       |       | AGO2 knock-down<br>log <sub>2</sub> (FC) |       |       |
|-------------|-------------|-------------------|-----------------------------------|--------|---------------|----------------------------------------------|-------|-------|------------------------------------------|-------|-------|
|             |             |                   |                                   |        |               | mNRA                                         | RPF   | TE    | mNRA                                     | RPF   | TE    |
| FBgn0002607 | RpL19       | YES               | No                                | Known  | YES           | 0.65                                         | -1.31 | -1.97 | 0.27                                     | 0.67  | 0.40  |
| FBgn0002622 | RpS3        | YES               | No                                | Known  | YES           | 0.64                                         | -1.00 | -1.64 | 0.04                                     | 0.72  | 0.68  |
| FBgn0002626 | RpL32       | YES               | No                                | Known  | YES           | 0.57                                         | -0.88 | -1.45 | 0.13                                     | 0.94  | 0.81  |
| FBgn0010408 | RpS9        | YES               | No                                | Known  | YES           | 0.67                                         | -1.33 | -2.00 | 0.32                                     | 0.80  | 0.48  |
| FBgn0011284 | RpS4        | YES               | No                                | Known  | YES           | 0.40                                         | -1.21 | -1.61 | 0.40                                     | 1.04  | 0.64  |
| FBgn0015288 | RpL22       | YES               | No                                | Known  | YES           | 0.53                                         | -0.81 | -1.34 | 0.86                                     | 0.67  | -0.19 |
| FBgn0017579 | RpL14       | YES               | No                                | Known  | YES           | 0.64                                         | -1.35 | -1.99 | 0.16                                     | 0.57  | 0.41  |
| FBgn0026372 | RpL23A      | YES               | No                                | Known  | YES           | 1.07                                         | -0.21 | -1.28 | 0.45                                     | 0.15  | -0.30 |
| FBgn0029785 | RpL35       | YES               | No                                | Known  | YES           | 0.46                                         | -1.18 | -1.64 | 0.22                                     | 0.58  | 0.36  |
| FBgn0031980 | RpL36A      | YES               | No                                | Known  | YES           | 0.19                                         | -1.20 | -1.39 | 0.33                                     | 0.97  | 0.63  |
| FBgn0034743 | RpS16       | YES               | No                                | Known  | YES           | 0.77                                         | -0.58 | -1.35 | 0.24                                     | 0.58  | 0.34  |
| FBgn0037351 | RpL13A      | YES               | No                                | Known  | YES           | 1.41                                         | -0.76 | -2.17 | 0.61                                     | 0.65  | 0.03  |
| FBgn0038834 | RpS30       | YES               | No                                | Known  | YES           | 0.46                                         | -1.03 | -1.49 | 0.07                                     | 0.41  | 0.34  |
| FBgn0039857 | RpL6        | YES               | No                                | Known  | YES           | 0.62                                         | -0.82 | -1.44 | 0.32                                     | 0.27  | -0.05 |
| FBgn0261602 | RpL8        | YES               | No                                | Known  | YES           | 1.29                                         | -1.30 | -2.59 | 0.50                                     | 0.68  | 0.18  |
| FBgn0261608 | RpL37A      | YES               | No                                | Known  | YES           | 0.49                                         | -0.68 | -1.17 | 0.76                                     | 0.78  | 0.02  |
| FBgn0010411 | RpS18       | YES               | No                                | Known  | YES           | 0.42                                         | -1.13 | -1.54 | 0.40                                     | 0.86  | 0.47  |
| FBgn0020618 | Rack1       | No                | No                                | Known  | YES           | 0.68                                         | -0.46 | -1.14 | 0.48                                     | 0.95  | 0.47  |
| FBgn0000556 | Ef1alpha48D | No                | YES                               | Known  | YES           | 0.47                                         | -1.72 | -2.19 | 0.41                                     | 0.76  | 0.35  |
| FBgn0000559 | EF2         | No                | YES                               | Known  | YES           | 0.01                                         | -0.75 | -0.76 | 0.10                                     | 0.68  | 0.59  |
| FBgn0022023 | eIF-3p40    | No                | YES                               | Known  | YES           | 0.50                                         | -0.46 | -0.96 | 0.19                                     | 0.82  | 0.63  |
| FBgn0025582 | Int6        | No                | YES                               | Known  | YES           | 0.04                                         | -0.80 | -0.84 | 0.27                                     | 0.54  | 0.27  |
| FBgn0003941 | RpL40       | YES               | No                                | Novel  | YES           | 0.12                                         | -0.82 | -0.94 | 0.23                                     | 0.52  | 0.30  |
| FBgn0003942 | RpS27A      | YES               | No                                | Novel  | YES           | 0.20                                         | -1.76 | -1.96 | 0.44                                     | 0.92  | 0.49  |
| FBgn0005533 | RpS17       | YES               | No                                | Novel  | YES           | 0.41                                         | -1.91 | -2.31 | 0.40                                     | 1.17  | 0.77  |
| FBgn0010265 | RpS13       | YES               | No                                | Novel  | YES           | 0.22                                         | -0.48 | -0.69 | 0.13                                     | 0.47  | 0.34  |
| FBgn0016726 | RpL29       | YES               | No                                | Novel  | YES           | 0.17                                         | -1.67 | -1.84 | 0.27                                     | 1.42  | 1.15  |
| FBgn0035422 | RpL28       | YES               | No                                | Novel  | YES           | 0.63                                         | -1.20 | -1.82 | 0.35                                     | 1.10  | 0.76  |
| FBgn0039757 | RpS7        | YES               | No                                | Novel  | YES           | 0.63                                         | -0.52 | -1.14 | -0.04                                    | 0.68  | 0.72  |
| FBgn0261596 | RpS24       | YES               | No                                | Novel  | YES           | 0.61                                         | -1.28 | -1.89 | 0.06                                     | 0.63  | 0.57  |
| FBgn0000116 | Argk        | No                | No                                | Novel  | YES           | -0.14                                        | -0.70 | -0.56 | -0.38                                    | -0.43 | -0.05 |
| FBgn0039830 | ATPsynC     | No                | No                                | Novel  | YES           | -0.13                                        | -0.72 | -0.59 | -0.01                                    | 0.28  | 0.28  |
| FBgn0010078 | RpL23       | YES               | No                                | Known  | No            | 0.93                                         | -1.01 | -1.93 | 0.06                                     | 0.37  | 0.31  |
| FBgn0010409 | RpL18A      | YES               | No                                | Known  | No            | 0.48                                         | -0.88 | -1.35 | 0.31                                     | 0.57  | 0.26  |
| FBgn0014026 | RpL7A       | YES               | No                                | Known  | No            | 0.71                                         | -0.79 | -1.51 | 0.14                                     | 0.62  | 0.48  |
| FBgn0033699 | RpS11       | YES               | No                                | Known  | No            | 0.26                                         | -1.35 | -1.61 | 0.22                                     | 0.84  | 0.62  |
| FBgn0034138 | RpS15       | YES               | No                                | Known  | No            | 0.31                                         | -1.04 | -1.35 | 0.25                                     | 0.70  | 0.45  |
| FBgn0039406 | RpL34a      | YES               | No                                | Known  | No            | 0.39                                         | -1.38 | -1.77 | -0.44                                    | 0.00  | 0.44  |
| FBgn0000100 | RpLP0       | YES               | No                                | Known  | No            | 0.62                                         | -1.04 | -1.67 | 0.23                                     | 0.82  | 0.59  |

|             |           |     |     |       |    |       |       |       |       |       |       |
|-------------|-----------|-----|-----|-------|----|-------|-------|-------|-------|-------|-------|
| FBgn0037270 | eIF3f1    | No  | YES | Known | No | 0.73  | -0.38 | -1.12 | 0.41  | 0.59  | 0.18  |
| FBgn0002590 | RpS5a     | YES | No  | Known | No | 0.45  | -0.19 | -0.63 | 0.38  | 0.44  | 0.06  |
| FBgn0003279 | RpL4      | YES | No  | Known | No | 1.01  | -0.97 | -1.98 | 0.34  | 0.41  | 0.07  |
| FBgn0004403 | RpS14a    | YES | No  | Known | No | 0.70  | -1.27 | -1.97 | 0.40  | 1.31  | 0.91  |
| FBgn0004404 | RpS14b    | YES | No  | Known | No | 0.57  | -1.22 | -1.79 | 0.42  | 1.26  | 0.84  |
| FBgn0005593 | RpL7      | YES | No  | Known | No | 0.48  | -0.77 | -1.25 | 0.11  | 1.11  | 1.00  |
| FBgn0010198 | RpS15Aa   | YES | No  | Known | No | 0.03  | -1.75 | -1.78 | 0.46  | 1.27  | 0.81  |
| FBgn0010412 | RpS19a    | YES | No  | Known | No | 0.64  | -1.27 | -1.90 | 0.35  | 0.44  | 0.09  |
| FBgn0015521 | RpS21     | YES | No  | Known | No | 0.96  | -1.12 | -2.08 | 0.21  | 0.71  | 0.50  |
| FBgn0015756 | RpL9      | YES | No  | Known | No | 0.10  | -0.55 | -0.65 | 0.51  | 0.67  | 0.17  |
| FBgn0017545 | RpS3A     | YES | No  | Known | No | -0.20 | -1.54 | -1.34 | 0.56  | 0.92  | 0.36  |
| FBgn0019936 | RpS20     | YES | No  | Known | No | 0.22  | -0.84 | -1.07 | 0.18  | 0.71  | 0.53  |
| FBgn0023170 | RpL39     | YES | No  | Known | No | -0.12 | -1.77 | -1.65 | 0.60  | 1.21  | 0.60  |
| FBgn0030616 | RpL37a    | YES | No  | Known | No | 1.00  | -1.57 | -2.57 | 0.16  | 0.59  | 0.43  |
| FBgn0032518 | RpL24     | YES | No  | Known | No | 0.87  | -0.38 | -1.25 | 0.48  | 0.64  | 0.16  |
| FBgn0032987 | RpL21     | YES | No  | Known | No | 0.02  | -2.07 | -2.09 | 0.15  | 1.06  | 0.91  |
| FBgn0033555 | RpS15Ab   | YES | No  | Known | No | -0.02 | -0.15 | -0.13 | 0.23  | -0.07 | -0.31 |
| FBgn0034968 | RpL12     | YES | No  | Known | No | 0.45  | -0.77 | -1.22 | 0.16  | 0.78  | 0.62  |
| FBgn0035753 | RpL18     | YES | No  | Known | No | 1.08  | -0.92 | -2.00 | 0.54  | 0.75  | 0.22  |
| FBgn0036213 | RpL10Ab   | YES | No  | Known | No | 0.33  | -1.12 | -1.44 | 0.31  | 0.64  | 0.33  |
| FBgn0037686 | RpL34b    | YES | No  | Known | No | 1.22  | -0.47 | -1.69 | 0.22  | 0.20  | -0.02 |
| FBgn0039129 | RpS19b    | YES | No  | Known | No | 0.11  | -1.35 | -1.45 | -0.82 | -0.65 | 0.18  |
| FBgn0040007 | RpL38     | YES | No  | Known | No | -0.12 | -1.55 | -1.43 | 0.91  | 1.13  | 0.22  |
| FBgn0064225 | RpL5      | YES | No  | Known | No | 0.06  | -1.28 | -1.34 | 0.83  | 1.17  | 0.34  |
| FBgn0086472 | RpS25     | YES | No  | Known | No | 0.36  | -0.71 | -1.07 | -0.06 | 0.53  | 0.59  |
| FBgn0086710 | RpL30     | YES | No  | Known | No | 0.58  | -1.20 | -1.78 | 0.07  | 1.05  | 0.98  |
| FBgn0261593 | RpS10b    | YES | No  | Known | No | 0.96  | -1.20 | -2.16 | 0.57  | 0.94  | 0.36  |
| FBgn0261597 | RpS26     | YES | No  | Known | No | 0.86  | -1.29 | -2.15 | 0.93  | 0.93  | 0.00  |
| FBgn0002593 | RpLP1     | YES | No  | Known | No | 0.67  | -0.44 | -1.12 | 0.39  | 0.72  | 0.34  |
| FBgn0003274 | RpLP2     | YES | No  | Known | No | 0.64  | -1.26 | -1.90 | 0.23  | 0.50  | 0.27  |
| FBgn0001215 | Hrb98DE   | No  | No  | Known | No | -0.50 | -0.73 | -0.23 | 0.14  | 0.25  | 0.11  |
| FBgn0004237 | Hrb87F    | No  | No  | Known | No | -0.07 | -0.36 | -0.29 | 0.19  | 0.15  | -0.04 |
| FBgn0037874 | Tctp      | No  | No  | Known | No | 0.05  | -1.30 | -1.36 | 0.21  | 0.54  | 0.33  |
| FBgn0050185 | CG30185   | No  | No  | Known | No | 0.18  | -0.52 | -0.70 | 0.03  | -0.27 | -0.30 |
| FBgn0265297 | pAbp      | No  | No  | Known | No | -0.02 | -0.39 | -0.38 | 0.64  | 1.04  | 0.40  |
| FBgn0028737 | Ef1beta   | No  | YES | Known | No | 0.64  | -0.93 | -1.57 | 0.28  | 0.45  | 0.17  |
| FBgn0029176 | Ef1gamma  | No  | YES | Known | No | 0.66  | -0.89 | -1.55 | 0.16  | 0.62  | 0.46  |
| FBgn0032198 | eEF1delta | No  | YES | Known | No | -1.06 | -0.96 | 0.10  | -0.16 | -0.34 | -0.18 |
| FBgn0011272 | RpL13     | YES | No  | Novel | No | 0.75  | -1.11 | -1.86 | 0.42  | 0.29  | -0.14 |
| FBgn0039790 | CG2246    | No  | No  | Novel | No | 0.34  | -0.18 | -0.53 | 0.11  | 0.27  | 0.15  |
| FBgn0020910 | RpL3      | YES | No  | Novel | No | 0.62  | 0.02  | -0.60 | 0.37  | 0.77  | 0.40  |
| FBgn0028697 | RpL15     | YES | No  | Novel | No | 0.09  | -2.14 | -2.23 | 0.56  | 1.30  | 0.74  |
| FBgn0032404 | RpL7-like | YES | No  | Novel | No | 0.21  | -1.37 | -1.58 | 0.10  | 0.36  | 0.26  |

|             |            |     |     |       |    |       |       |       |       |       |       |
|-------------|------------|-----|-----|-------|----|-------|-------|-------|-------|-------|-------|
| FBgn0034361 | mRpS28     | YES | No  | Novel | No | 0.42  | -0.74 | -1.16 | -0.01 | 0.36  | 0.38  |
| FBgn0039300 | RpS27      | YES | No  | Novel | No | 0.81  | -0.12 | -0.92 | -0.20 | 0.01  | 0.21  |
| FBgn0039359 | RpL27      | YES | No  | Novel | No | 0.40  | -1.73 | -2.13 | 0.24  | 1.06  | 0.82  |
| FBgn0039713 | RpS8       | YES | No  | Novel | No | 0.98  | -0.51 | -1.49 | 0.32  | 0.58  | 0.26  |
| FBgn0261599 | RpS29      | YES | No  | Novel | No | 0.39  | -0.16 | -0.54 | 0.28  | 1.07  | 0.78  |
| FBgn0261606 | RpL27A     | YES | No  | Novel | No | 0.51  | -0.78 | -1.30 | 0.20  | 0.29  | 0.09  |
| FBgn0000826 | png        | No  | No  | Novel | No | 1.04  | -0.06 | -1.10 | -0.32 | -0.34 | -0.03 |
| FBgn0001091 | Gapdh1     | No  | No  | Novel | No | 0.21  | -0.66 | -0.87 | -0.11 | -0.08 | 0.02  |
| FBgn0010417 | Taf6       | No  | No  | Novel | No | 0.85  | 0.13  | -0.71 | -0.06 | 0.25  | 0.31  |
| FBgn0010602 | lwr        | No  | No  | Novel | No | 0.50  | -0.12 | -0.61 | -0.38 | -0.33 | 0.05  |
| FBgn0010808 | l(3)03670  | No  | No  | Novel | No | 0.36  | -0.67 | -1.04 | -0.22 | 0.00  | 0.23  |
| FBgn0011768 | Fdh        | No  | No  | Novel | No | 0.22  | -0.88 | -1.10 | -0.14 | -0.07 | 0.07  |
| FBgn0015019 | Cctgamma   | No  | No  | Novel | No | -0.19 | -1.01 | -0.82 | -0.09 | -0.02 | 0.07  |
| FBgn0021979 | l(2)k09913 | No  | No  | Novel | No | 0.93  | 0.30  | -0.62 | 0.18  | 0.26  | 0.08  |
| FBgn0025814 | Mgstl      | No  | No  | Novel | No | 0.09  | -0.62 | -0.71 | 0.00  | -0.59 | -0.59 |
| FBgn0026409 | Mpcp       | No  | No  | Novel | No | 0.39  | -0.51 | -0.89 | 0.25  | 0.38  | 0.13  |
| FBgn0027080 | Aats-tyr   | No  | No  | Novel | No | 0.30  | -0.73 | -1.03 | -0.27 | 0.12  | 0.39  |
| FBgn0027335 | Rip11      | No  | No  | Novel | No | 0.70  | 0.18  | -0.52 | -0.22 | -0.41 | -0.19 |
| FBgn0027525 | CG7686     | No  | No  | Novel | No | 0.79  | 0.01  | -0.78 | 0.19  | 0.66  | 0.48  |
| FBgn0029830 | Grip       | No  | No  | Novel | No | 0.63  | 0.08  | -0.56 | 0.23  | 0.14  | -0.09 |
| FBgn0030151 | CG1354     | No  | No  | Novel | No | 0.20  | -0.80 | -1.01 | -0.45 | 0.05  | 0.50  |
| FBgn0031053 | CG14223    | No  | No  | Novel | No | 1.26  | 0.05  | -1.22 | -0.29 | -0.22 | 0.07  |
| FBgn0031450 | Hrs        | No  | No  | Novel | No | 0.81  | 0.27  | -0.54 | -0.12 | -0.11 | 0.01  |
| FBgn0031664 | CG8892     | No  | No  | Novel | No | 0.33  | -0.24 | -0.58 | -0.18 | -0.45 | -0.28 |
| FBgn0032089 | Rcd-1r     | No  | No  | Novel | No | -0.30 | -1.00 | -0.70 | -1.27 | -1.13 | 0.15  |
| FBgn0035445 | CG12014    | No  | No  | Novel | No | 0.63  | -0.17 | -0.81 | -0.39 | -0.21 | 0.19  |
| FBgn0036877 | CG9452     | No  | No  | Novel | No | 0.51  | 0.01  | -0.50 | -1.48 | -1.18 | 0.30  |
| FBgn0036974 | eRF1       | No  | No  | Novel | No | -0.20 | -0.95 | -0.75 | 0.36  | 0.40  | 0.04  |
| FBgn0037688 | CG9356     | No  | No  | Novel | No | 0.49  | -0.15 | -0.64 | -0.46 | 0.10  | 0.56  |
| FBgn0039337 | MED28      | No  | No  | Novel | No | 0.34  | -0.36 | -0.69 | -0.31 | -0.59 | -0.29 |
| FBgn0039881 | CG1971     | No  | No  | Novel | No | 0.23  | -0.39 | -0.62 | -0.96 | -0.74 | 0.22  |
| FBgn0086904 | Nacalpha   | No  | No  | Novel | No | 0.55  | -0.85 | -1.39 | 0.32  | 0.52  | 0.19  |
| FBgn0015834 | Trip1      | No  | YES | Novel | No | 0.06  | -0.70 | -0.77 | 0.14  | 0.44  | 0.30  |

Source: known, homologous to known 5' TOP gene in human; novel, this study.  
tsRNA Target: strong targets of tsRNAs in S2 cell

**Table S7** Predicted target genes of the nine tsRNAs that are involved in the global translational regulation

| tsRNA | gene ID     | gene name      |
|-------|-------------|----------------|
| T3    | FBgn0029095 | aru            |
| T3    | FBgn0037529 | mRpS9          |
| T3    | FBgn0053158 | CG33158        |
| T6    | FBgn0020443 | Elf            |
| T10   | FBgn0053155 | CG33155        |
| T10   | FBgn0053158 | CG33158        |
| T10   | FBgn0066084 | RpL41          |
| T10   | FBgn0086706 | pix            |
| T13   | FBgn0000556 | Ef1alpha48D    |
| T13   | FBgn0000559 | EF2            |
| T13   | FBgn0002593 | RpLP1          |
| T13   | FBgn0005533 | RpS17          |
| T13   | FBgn0010408 | RpS9           |
| T13   | FBgn0013325 | RpL11          |
| T13   | FBgn0015288 | RpL22          |
| T13   | FBgn0027087 | Aats-his       |
| T13   | FBgn0028744 | CG5033         |
| T13   | FBgn0032138 | CG4364         |
| T13   | FBgn0033912 | RpS23          |
| T13   | FBgn0034087 | clu            |
| T13   | FBgn0034743 | RpS16          |
| T13   | FBgn0036774 | mRpS26         |
| T13   | FBgn0039175 | CG5706         |
| T13   | FBgn0039182 | CG5728         |
| T13   | FBgn0040227 | eIF-3p66       |
| T13   | FBgn0261602 | RpL8           |
| T14   | FBgn0000559 | EF2            |
| T14   | FBgn0003942 | RpS27A         |
| T14   | FBgn0004407 | DNApol-gamma35 |
| T14   | FBgn0011284 | RpS4           |
| T14   | FBgn0024556 | EfTuM          |
| T14   | FBgn0029176 | Ef1gamma       |
| T14   | FBgn0034087 | clu            |
| T14   | FBgn0034858 | eIF2B-delta    |
| T14   | FBgn0036686 | CG7728         |
| T14   | FBgn0036974 | eRF1           |
| T14   | FBgn0037270 | CG9769         |
| T14   | FBgn0038834 | RpS30          |
| T14   | FBgn0053155 | CG33155        |
| T14   | FBgn0066084 | RpL41          |
| T14   | FBgn0086706 | pix            |
| T15   | FBgn0000556 | Ef1alpha48D    |
| T15   | FBgn0000559 | EF2            |
| T15   | FBgn0001942 | eIF-4a         |
| T15   | FBgn0004407 | DNApol-gamma35 |
| T15   | FBgn0005674 | Aats-glupro    |
| T15   | FBgn0010078 | RpL23          |
| T15   | FBgn0011272 | RpL13          |
| T15   | FBgn0011284 | RpS4           |
| T15   | FBgn0015075 | Ddx1           |
| T15   | FBgn0015806 | S6k            |
| T15   | FBgn0020305 | dbe            |

|     |             |             |
|-----|-------------|-------------|
| T15 | FBgn0020443 | Elf         |
| T15 | FBgn0022023 | eIF-3p40    |
| T15 | FBgn0024182 | waw         |
| T15 | FBgn0024251 | bbx         |
| T15 | FBgn0026196 | nop5        |
| T15 | FBgn0026259 | eIF5B       |
| T15 | FBgn0028744 | CG5033      |
| T15 | FBgn0028962 | Aats-ala-m  |
| T15 | FBgn0030063 | CG1789      |
| T15 | FBgn0032050 | CG13096     |
| T15 | FBgn0032138 | CG4364      |
| T15 | FBgn0032298 | CG6724      |
| T15 | FBgn0032404 | RpL7-like   |
| T15 | FBgn0032486 | CG5705      |
| T15 | FBgn0033379 | Mys45A      |
| T15 | FBgn0034029 | eIF2B-gamma |
| T15 | FBgn0034401 | CG15100     |
| T15 | FBgn0034743 | RpS16       |
| T15 | FBgn0035064 | Aats-tyr-m  |
| T15 | FBgn0037249 | eIF3-S10    |
| T15 | FBgn0038146 | CG9799      |
| T15 | FBgn0039406 | RpL34a      |
| T15 | FBgn0039588 | CG12413     |
| T15 | FBgn0039757 | RpS7        |
| T15 | FBgn0039857 | RpL6        |
| T15 | FBgn0040227 | eIF-3p66    |
| T15 | FBgn0053158 | CG33158     |
| T15 | FBgn0083983 | mRpL34      |
| T15 | FBgn0086706 | pix         |
| T15 | FBgn0261593 | RpS10b      |
| T15 | FBgn0261602 | RpL8        |
| T16 | FBgn0003517 | sta         |
| T16 | FBgn0010408 | RpS9        |
| T16 | FBgn0017579 | RpL14       |
| T16 | FBgn0020305 | dbe         |
| T16 | FBgn0024182 | waw         |
| T16 | FBgn0024251 | bbx         |
| T16 | FBgn0027084 | Aats-lys    |
| T16 | FBgn0027087 | Aats-his    |
| T16 | FBgn0029176 | Ef1gamma    |
| T16 | FBgn0032050 | CG13096     |
| T16 | FBgn0033741 | CG8545      |
| T16 | FBgn0034858 | eIF2B-delta |
| T16 | FBgn0035942 | CG5660      |
| T16 | FBgn0036569 | CG5414      |
| T16 | FBgn0036686 | CG7728      |
| T16 | FBgn0036974 | eRF1        |
| T16 | FBgn0037073 | CG7338      |
| T16 | FBgn0037270 | CG9769      |
| T16 | FBgn0038834 | RpS30       |
| T16 | FBgn0039359 | RpL27       |
| T16 | FBgn0039555 | mRpS22      |
| T16 | FBgn0039566 | CG4849      |
| T16 | FBgn0039588 | CG12413     |
| T16 | FBgn0051133 | Slimp       |
| T16 | FBgn0053155 | CG33155     |
| T16 | FBgn0260441 | RpS12       |
| T16 | FBgn0261602 | RpL8        |

|     |             |               |
|-----|-------------|---------------|
| T17 | FBgn0000100 | RpLP0         |
| T17 | FBgn0000559 | EF2           |
| T17 | FBgn0002607 | RpL19         |
| T17 | FBgn0002622 | RpS3          |
| T17 | FBgn0002626 | RpL32         |
| T17 | FBgn0005674 | Aats-glupro   |
| T17 | FBgn0010409 | RpL18A        |
| T17 | FBgn0010803 | Aats-trp      |
| T17 | FBgn0011272 | RpL13         |
| T17 | FBgn0011284 | RpS4          |
| T17 | FBgn0014026 | RpL7A         |
| T17 | FBgn0015806 | S6k           |
| T17 | FBgn0019949 | Cdk9          |
| T17 | FBgn0021995 | Rs1           |
| T17 | FBgn0023512 | eIF2B-epsilon |
| T17 | FBgn0025582 | Int6          |
| T17 | FBgn0026372 | RpL23A        |
| T17 | FBgn0027079 | Aats-val      |
| T17 | FBgn0027084 | Aats-lys      |
| T17 | FBgn0027087 | Aats-his      |
| T17 | FBgn0029664 | CG10802       |
| T17 | FBgn0029785 | RpL35         |
| T17 | FBgn0030007 | CG2263        |
| T17 | FBgn0030786 | mRpL22        |
| T17 | FBgn0031980 | RpL36A        |
| T17 | FBgn0032404 | RpL7-like     |
| T17 | FBgn0033379 | Mys45A        |
| T17 | FBgn0033741 | CG8545        |
| T17 | FBgn0033912 | RpS23         |
| T17 | FBgn0034087 | clu           |
| T17 | FBgn0034401 | CG15100       |
| T17 | FBgn0034858 | eIF2B-delta   |
| T17 | FBgn0036135 | mRpL2         |
| T17 | FBgn0036629 | CG4573        |
| T17 | FBgn0037073 | CG7338        |
| T17 | FBgn0038834 | RpS30         |
| T17 | FBgn0038923 | mRpL35        |
| T17 | FBgn0039182 | CG5728        |
| T17 | FBgn0039828 | CG1542        |
| T17 | FBgn0040389 | mRpL14        |
| T17 | FBgn0051739 | CG31739       |
| T17 | FBgn0053123 | CG33123       |
| T17 | FBgn0086706 | pix           |
| T17 | FBgn0260460 | mRpS34        |
| T17 | FBgn0261593 | RpS10b        |
| T17 | FBgn0261597 | RpS26         |
| T17 | FBgn0261602 | RpL8          |
| T18 | FBgn0000559 | EF2           |
| T18 | FBgn0002593 | RpLP1         |
| T18 | FBgn0010409 | RpL18A        |
| T18 | FBgn0011272 | RpL13         |
| T18 | FBgn0015756 | RpL9          |
| T18 | FBgn0020305 | dbe           |
| T18 | FBgn0027079 | Aats-val      |
| T18 | FBgn0027085 | Aats-leu      |
| T18 | FBgn0029176 | Ef1gamma      |
| T18 | FBgn0030007 | CG2263        |
| T18 | FBgn0031639 | mRpS2         |

|     |             |          |
|-----|-------------|----------|
| T18 | FBgn0033548 | CG7637   |
| T18 | FBgn0033699 | RpS11    |
| T18 | FBgn0037249 | eIF3-S10 |
| T18 | FBgn0037529 | mRpS9    |
| T18 | FBgn0038146 | CG9799   |
| T18 | FBgn0039153 | CG5463   |
| T18 | FBgn0039566 | CG4849   |
| T18 | FBgn0051739 | CG31739  |
| T18 | FBgn0066084 | RpL41    |

**Table S8. The 7-mer motifs whose densities are positively correlated with the *fe* scores in the AGO2 CLIP-Seq data**

| Sequence of<br>7-mer | Spearman's<br>correlation with<br>fold changes of<br>RPKM |          | Differences in densities of this 7-mer<br>between RPs/IEFs and the remaining<br>genes<br>(Among all expressed genes) |                              |          | Differences in densities of this 7-mer<br>between RPs/IEFs and the remaining<br>genes<br>(Among tsRNA target genes) |                              |          |
|----------------------|-----------------------------------------------------------|----------|----------------------------------------------------------------------------------------------------------------------|------------------------------|----------|---------------------------------------------------------------------------------------------------------------------|------------------------------|----------|
|                      | <i>rho</i>                                                | <i>P</i> | RPs/IEFs<br>(mean)                                                                                                   | Remaining<br>genes<br>(mean) | <i>P</i> | RPs/IEFs<br>(mean)                                                                                                  | Remaining<br>genes<br>(mean) | <i>P</i> |
| AAGAAGG              | 0.573                                                     | 4.7E-10  | 1.847                                                                                                                | 0.268                        | 4.4E-13  | 2.337                                                                                                               | 0.368                        | 7.9E-10  |
| CAAGAAG              | 0.613                                                     | 1.2E-11  | 3.141                                                                                                                | 0.424                        | 3.4E-24  | 4.256                                                                                                               | 0.579                        | 5.0E-16  |
| CAAGACC              | 0.435                                                     | 6.2E-06  | 0.891                                                                                                                | 0.145                        | 5.5E-08  | 0.974                                                                                                               | 0.195                        | 1.5E-04  |
| CCAAGAA              | 0.484                                                     | 3.5E-07  | 1.700                                                                                                                | 0.264                        | 4.7E-15  | 2.117                                                                                                               | 0.330                        | 6.2E-11  |
| CCGCAAG              | 0.493                                                     | 1.9E-07  | 1.017                                                                                                                | 0.138                        | 2.1E-06  | 1.336                                                                                                               | 0.174                        | 1.3E-04  |
| CGCAAGG              | 0.445                                                     | 3.5E-06  | 0.981                                                                                                                | 0.164                        | 3.7E-05  | 1.483                                                                                                               | 0.211                        | 1.9E-06  |
| GAAGAAG              | 0.363                                                     | 2.0E-04  | 1.957                                                                                                                | 0.318                        | 4.6E-10  | 2.785                                                                                                               | 0.381                        | 3.9E-13  |
| GCAAGGT              | 0.496                                                     | 1.6E-07  | 0.767                                                                                                                | 0.100                        | 1.3E-05  | 0.810                                                                                                               | 0.120                        | 1.5E-04  |

In the Spearman's correlation analysis, for each motif, the genes were grouped into 100 bins based on increasing densities of the 7-mer motif and the correlation was calculated between the mean density of that motif and the mean *fe* score in each bin.
