# Supplementary material for: Drosophila tsRNAs preferentially suppress general translation machinery via antisense pairing and participate in cellular starvation response
Source: Oxford University Press journal article supplement (doi:10.1093/nar/gky189), 2018-03-03
Supplement: gky189_supp.zip [file gky189_supp.zip › Table S2.xlsx]

## Sheet: Sheet1
Table S2. Public small RNA sequencing libraries of Drosophila.
Accession	Species	Sample	Tissue	Tissue_other	Sex	Mutant	Mutant_other	Treatment	IP
GSM280082	Drosophila melanogaster	SAMN02195349	ovary	2-4d	female	WT	Celera	NA	NA
GSM280083	Drosophila melanogaster	SAMN02195350	ovary	2-4d	female	dcr-2	hom	NA	NA
GSM280084	Drosophila melanogaster	SAMN02195351	ovary	2-4d	female	loqs	hom	NA	NA
GSM280085	Drosophila melanogaster	SAMN02195352	testis	2-4d	male	WT	Oregon-R	NA	NA
GSM280086	Drosophila melanogaster	SAMN02195353	ovary	2-4d	female	WT	NA	NA	AGO2
GSM280087	Drosophila melanogaster	SAMN02195354	S2	NA	NA	WT	pCasper_FLAG-HA-AGO2	NA	AGO2
GSM280088	Drosophila melanogaster	SAMN02195355	S2	NA	NA	WT	pCasper_FLAG-HA-AGO2	NA	AGO1
GSM360256	Drosophila melanogaster	SAMN02195577	larva	1d	NA	WT	NA	NA	NA
GSM360257	Drosophila melanogaster	SAMN02195578	larva	1d	NA	WT	NA	NA	NA
GSM360260	Drosophila melanogaster	SAMN02195579	pupa	0-1d	NA	WT	NA	NA	NA
GSM360262	Drosophila melanogaster	SAMN02195580	pupa	0-2d	NA	WT	NA	NA	NA
SRR013600	Drosophila melanogaster	SAMN00003095	larva	3d	NA	WT	Canton S	NA	NA
SRR013601	Drosophila melanogaster	SAMN00003096	pupa	2-4d	NA	WT	Canton S	NA	NA
SRR013602	Drosophila melanogaster	SAMN00003097	larva	3d	NA	WT	Canton S	NA	NA
SRR013603	Drosophila melanogaster	SAMN00003098	pupa	2-4d	NA	WT	Canton S	NA	NA
SRR013604	Drosophila melanogaster	SAMN00003099	head	NA	female	WT	Canton S	NA	NA
SRR014367	Drosophila melanogaster	SAMN00002138	embryo	12-24hr	NA	WT	Canton S	NA	NA
SRR015372	Drosophila melanogaster	SAMN00002432	S2	S2-NP	NA	WT	NA	NA	NA
SRR016820	Drosophila melanogaster	SAMN00002477	ovary	NA	female	armi	armi1/TM3 and armi72.1/TM3	NA	NA
SRR016821	Drosophila melanogaster	SAMN00002478	ovary	NA	female	piwi	piwi1/2	NA	NA
SRR016822	Drosophila melanogaster	SAMN00002479	ovary	NA	female	spnE	spnE1/TM3 and spnE100.37/TM3	NA	NA
SRR016823	Drosophila melanogaster	SAMN00002480	ovary	NA	female	spnE	spnE1/100.37	NA	NA
SRR016824	Drosophila melanogaster	SAMN00002481	ovary	NA	female	squ	squHE47/cyo and squPP32/cyo	NA	NA
SRR016825	Drosophila melanogaster	SAMN00002482	ovary	NA	female	squ	squHE47/PP32	NA	NA
SRR016826	Drosophila melanogaster	SAMN00002483	ovary	NA	female	vas	vasD5/cyo and vasPH165/cyo	NA	NA
SRR016827	Drosophila melanogaster	SAMN00002484	ovary	NA	female	vas	vasD5/PH165	NA	NA
SRR016828	Drosophila melanogaster	SAMN00002485	ovary	NA	female	zuc	zucHM27/cyo and zucDf(2l)PRL/cyo	NA	NA
SRR016829	Drosophila melanogaster	SAMN00002486	ovary	NA	female	zuc	zucHM27/Df(2l)PRL	NA	NA
SRR016831	Drosophila melanogaster	SAMN00002488	ovary	NA	female	armi	armi1/72.1	NA	NA
SRR016832	Drosophila melanogaster	SAMN00002489	ovary	NA	female	aub	aubHN2/cyo and aubQC42/cyo	NA	NA
SRR016833	Drosophila melanogaster	SAMN00002490	ovary	NA	female	aub	aubHN2/QC42	NA	NA
SRR016834	Drosophila melanogaster	SAMN00002491	ovary	NA	female	flam	flamKG00476/FM4	NA	NA
SRR016835	Drosophila melanogaster	SAMN00002492	ovary	NA	female	flam	flamKg00476	NA	NA
SRR016836	Drosophila melanogaster	SAMN00002493	ovary	NA	female	krimp	krimpF06583/cyo	NA	NA
SRR016837	Drosophila melanogaster	SAMN00002494	ovary	NA	female	krimp	krimpF06583	NA	NA
SRR016838	Drosophila melanogaster	SAMN00002495	ovary	NA	female	piwi	piwi1/cyo and piwi2/cyo	NA	NA
SRR016853	Drosophila melanogaster	SAMN00002503	larva	3d; imaginal disc/brain	NA	WT	NA	NA	NA
SRR016854	Drosophila melanogaster	SAMN00002504	body	NA	male	WT	NA	NA	NA
SRR016855	Drosophila melanogaster	SAMN00002505	Kc167	NA	NA	WT	NA	NA	NA
SRR018039	Drosophila melanogaster	SAMN00002502	body	NA	female	WT	NA	NA	NA
SRR019717	Drosophila melanogaster	SAMN00002799	OSS	NA	NA	WT	NA	NA	NA
SRR019718	Drosophila melanogaster	SAMN00002800	OSS	NA	NA	WT	NA	NA	NA
SRR019719	Drosophila melanogaster	SAMN00002801	OSS	NA	NA	WT	NA	NA	NA
SRR019720	Drosophila melanogaster	SAMN00002802	OSS	NA	NA	WT	NA	NA	NA
SRR028728	Drosophila melanogaster	SAMN00004021	Kc167	NA	NA	WT	NA	NA	NA
SRR028729	Drosophila melanogaster	SAMN00004022	Kc167	NA	NA	WT	NA	NA	NA
SRR029608	Drosophila melanogaster	SAMN00004949	head	NA	NA	hen1	het	NA	NA
SRR029633	Drosophila melanogaster	SAMN00004950	head	NA	NA	hen1	hom	NA	NA
SRR031692	Drosophila melanogaster	SAMN00006260	head	NA	NA	WT	Oregon-R	NA	NA
SRR031693	Drosophila melanogaster	SAMN00006261	head	NA	NA	WT	Oregon-R	oxidized	NA
SRR031694	Drosophila melanogaster	SAMN00006261	head	NA	NA	WT	Oregon-R	oxidized	NA
SRR031696	Drosophila melanogaster	SAMN00006262	head	NA	NA	WT	Oregon-R	NA	AGO1
SRR031697	Drosophila melanogaster	SAMN00006263	head	NA	NA	dcr-2	het	NA	NA
SRR031698	Drosophila melanogaster	SAMN00006264	head	NA	NA	dcr-2	het	oxidized	NA
SRR031699	Drosophila melanogaster	SAMN00006265	head	NA	NA	dcr-2	hom	NA	NA
SRR031700	Drosophila melanogaster	SAMN00006266	head	NA	NA	dcr-2	hom	oxidized	NA
SRR031701	Drosophila melanogaster	SAMN00006267	head	NA	NA	r2d2	het	NA	NA
SRR031702	Drosophila melanogaster	SAMN00006268	head	NA	NA	r2d2	het	oxidized	NA
SRR031703	Drosophila melanogaster	SAMN00006269	head	NA	NA	r2d2	hom	NA	NA
SRR031704	Drosophila melanogaster	SAMN00006270	head	NA	NA	r2d2	hom	oxidized	NA
SRR032092	Drosophila melanogaster	SAMN00006978	S2	S2-NP	NA	WT	mock	oxidized	NA
SRR032093	Drosophila melanogaster	SAMN00006979	S2	S2-NP	NA	ago1	knockdown	NA	NA
SRR032094	Drosophila melanogaster	SAMN00006980	S2	S2-NP	NA	ago2	knockdown	NA	NA
SRR032095	Drosophila melanogaster	SAMN00006981	S2	S2-NP	NA	dcr-2	knockdown	NA	AGO1
SRR032096	Drosophila melanogaster	SAMN00006982	S2	S2-NP	NA	dcr-2	knockdown	NA	AGO2
SRR032152	Drosophila melanogaster	SAMN00006262	head	NA	NA	WT	Oregon-R	NA	AGO1
SRR060643	Drosophila melanogaster	SAMN00017157	testis	NA	NA	WT	A2	NA	NA
SRR060644	Drosophila melanogaster	SAMN00017158	ovary	NA	NA	WT	A2	NA	NA
SRR060645	Drosophila melanogaster	SAMN00017159	testis	NA	NA	WT	yw67c23(2)	NA	NA
SRR060646	Drosophila melanogaster	SAMN00017160	ovary	NA	NA	WT	yw67c23(2)	NA	NA
SRR060647	Drosophila melanogaster	SAMN00017161	ovary	NA	NA	WT	A2	NA	AGO2
SRR060648	Drosophila melanogaster	SAMN00017162	ovary	NA	NA	WT	A2	NA	AUB
SRR060649	Drosophila melanogaster	SAMN00017163	ovary	NA	NA	WT	A2	NA	PIWI
SRR060650	Drosophila melanogaster	SAMN00017164	testis	NA	NA	WT	A1	NA	NA
SRR060651	Drosophila melanogaster	SAMN00017165	ovary	NA	NA	WT	A2	NA	AGO3
SRR060652	Drosophila melanogaster	SAMN00017166	testis	NA	NA	WT	hs-Penelope	NA	NA
SRR060653	Drosophila melanogaster	SAMN00017167	ovary	NA	NA	WT	hs-Penelope	NA	NA
SRR060654	Drosophila virilis	SAMN00017168	ovary	NA	NA	WT	160x9	NA	NA
SRR060655	Drosophila virilis	SAMN00017169	testis	NA	NA	WT	9x160	NA	NA
SRR060656	Drosophila virilis	SAMN00017170	ovary	NA	NA	WT	9x160	NA	NA
SRR060657	Drosophila virilis	SAMN00017171	testis	NA	NA	WT	140	NA	NA
SRR060658	Drosophila virilis	SAMN00017172	ovary	NA	NA	WT	140	NA	NA
SRR060659	Drosophila virilis	SAMN00017173	testis	NA	NA	WT	Argentina	NA	NA
SRR060660	Drosophila virilis	SAMN00017174	ovary	NA	NA	WT	Argentina	NA	NA
SRR060661	Drosophila virilis	SAMN00017175	embryo	NA	NA	WT	160x9	NA	NA
SRR060662	Drosophila virilis	SAMN00017176	embryo	NA	NA	WT	9x160	NA	NA
SRR060663	Drosophila virilis	SAMN00017177	embryo	NA	NA	WT	160	NA	NA
SRR060664	Drosophila virilis	SAMN00017178	carcass	NA	NA	WT	9	NA	NA
SRR060665	Drosophila virilis	SAMN00017179	carcass	NA	NA	WT	9	NA	NA
SRR060666	Drosophila virilis	SAMN00017180	carcass	NA	NA	WT	160	NA	NA
SRR060667	Drosophila virilis	SAMN00017181	carcass	NA	NA	WT	160	NA	NA
SRR060668	Drosophila virilis	SAMN00017182	carcass	NA	NA	WT	160x9	NA	NA
SRR060669	Drosophila virilis	SAMN00017183	carcass	NA	NA	WT	160x9	NA	NA
SRR060670	Drosophila virilis	SAMN00017184	testis	NA	NA	WT	9	NA	NA
SRR060671	Drosophila virilis	SAMN00017185	carcass	NA	NA	WT	9x160	NA	NA
SRR060672	Drosophila virilis	SAMN00017186	carcass	NA	NA	WT	9x160	NA	NA
SRR060673	Drosophila virilis	SAMN00017187	ovary	NA	NA	WT	9	NA	NA
SRR060674	Drosophila virilis	SAMN00017188	ovary	NA	NA	WT	9x140	NA	NA
SRR060675	Drosophila virilis	SAMN00017189	ovary	NA	NA	WT	140x9	NA	NA
SRR060676	Drosophila virilis	SAMN00017190	ovary	NA	NA	WT	9xArg	NA	NA
SRR060677	Drosophila virilis	SAMN00017191	ovary	NA	NA	WT	Argx9	NA	NA
SRR060678	Drosophila virilis	SAMN00017192	testis	NA	NA	WT	9x140	NA	NA
SRR060679	Drosophila virilis	SAMN00017193	testis	NA	NA	WT	140x9	NA	NA
SRR060680	Drosophila virilis	SAMN00017194	testis	NA	NA	WT	9xArg	NA	NA
SRR060681	Drosophila virilis	SAMN00017195	testis	NA	NA	WT	Argx9	NA	NA
SRR060682	Drosophila virilis	SAMN00017196	embryo	NA	NA	WT	9x140	NA	NA
SRR060683	Drosophila virilis	SAMN00017197	testis	NA	NA	WT	160	NA	NA
SRR060684	Drosophila virilis	SAMN00017198	embryo	NA	NA	WT	140x9	NA	NA
SRR060685	Drosophila virilis	SAMN00017199	embryo	NA	NA	WT	9xArg	NA	NA
SRR060686	Drosophila virilis	SAMN00017200	embryo	NA	NA	WT	Argx9	NA	NA
SRR060687	Drosophila virilis	SAMN00017201	embryo	NA	NA	WT	9	NA	NA
SRR060688	Drosophila virilis	SAMN00017202	ovary	NA	NA	WT	160	NA	NA
SRR060689	Drosophila virilis	SAMN00017203	testis	NA	NA	WT	160x9	NA	NA
SRR065800	Drosophila melanogaster	SAMN00113409	ovary	4-5d	female	zuc	[zucHM27/SG63]	NA	NA
SRR065801	Drosophila melanogaster	SAMN00113410	ovary	4-5d	female	zuc	[zucHM27/CyO, zucSG63/CyO]	NA	NA
SRR065802	Drosophila melanogaster	SAMN00113411	ovary	4-5d	female	zuc	[zucHM27/Df(2I)PRL]	NA	PIWI
SRR065803	Drosophila melanogaster	SAMN00113412	ovary	4-5d	female	zuc	[zucHM27/CyO, zucDf(2I)PRL/CyO]	NA	PIWI
SRR065804	Drosophila melanogaster	SAMN00113413	ovary	4-5d	female	zuc	[zucHM27/SG63]	NA	PIWI
SRR065805	Drosophila melanogaster	SAMN00113414	ovary	4-5d	female	zuc	[zucHM27/CyO, zucSG63/CyO]	NA	PIWI
SRR065806	Drosophila melanogaster	SAMN00113415	ovary	4-5d	female	squ	[squHE47/PP32]	NA	PIWI
SRR065807	Drosophila melanogaster	SAMN00113416	ovary	4-5d	female	squ	[squHE47/CyO, squPP32/CyO]	NA	PIWI
SRR068998	Drosophila melanogaster	SAMN00115762	head	NA	female	WT	NA	NA	NA
SRR069243	Drosophila melanogaster	SAMN00115833	ML-DmBG3-c2	3d larva	CNS-derived	WT	ML-DmBG3-c2	NA	NA
SRR069246	Drosophila melanogaster	SAMN00115836	ML-DmBG1-c1	3d larva	CNS-derived	WT	ML-DmBG1-c1	NA	NA
SRR069257	Drosophila melanogaster	SAMN00115842	1182-4H	late embryo	NA	WT	1182-4H	NA	NA
SRR069259	Drosophila melanogaster	SAMN00115844	Sg4	late embryo	NA	WT	Sg4	NA	NA
SRR069506	Drosophila melanogaster	SAMN00115900	ML-DmD9	3d larva	dorsal mesothoracic disc	WT	ML-DmD9	NA	NA
SRR069508	Drosophila melanogaster	SAMN00115902	ML-DmD32	3d larva	dorsal mesothoracic disc	WT	ML-DmD32	NA	NA
SRR069542	Drosophila melanogaster	SAMN00115915	S2-DRSC	late embryo	NA	WT	S2-DRSC	NA	NA
SRR069829	Drosophila melanogaster	SAMN00116359	S2/Kc	NA	NA	WT	NA	NA	NA
SRR069830	Drosophila melanogaster	SAMN00116360	S2	NA	NA	WT	NA	NA	NA
SRR069831	Drosophila melanogaster	SAMN00116361	Kc	NA	NA	WT	NA	NA	NA
SRR069832	Drosophila melanogaster	SAMN00116362	larva	imaginal disc	NA	WT	NA	NA	NA
SRR069835	Drosophila melanogaster	SAMN00116365	head	NA	male	WT	NA	NA	NA
SRR069836	Drosophila melanogaster	SAMN00116366	body	NA	male	WT	NA	NA	NA
SRR069837	Drosophila melanogaster	SAMN00116367	body	NA	female	WT	NA	NA	NA
SRR069838	Drosophila melanogaster	SAMN00116368	embryo	6-10hr	NA	WT	NA	NA	NA
SRR069839	Drosophila melanogaster	SAMN00116369	embryo	6-10hr	NA	WT	NA	NA	NA
SRR069840	Drosophila melanogaster	SAMN00116370	embryo	0-1hr	NA	WT	NA	NA	NA
SRR073601	Drosophila melanogaster	SAMN00138387	ovary	NA	NA	r2d2	r2d2[1]	NA	NA
SRR073602	Drosophila melanogaster	SAMN00138388	ovary	NA	NA	ago2	ago2[414]	NA	NA
SRR1024326	Drosophila melanogaster	SAMN02393666	ovary	2-4d	female	WT	LacO-Vasp-EGFP; LacI	oxidized	NA
SRR1024327	Drosophila melanogaster	SAMN02393666	ovary	2-4d	female	WT	LacO-Vasp-EGFP; LacI	oxidized	NA
SRR1024328	Drosophila melanogaster	SAMN02393667	ovary	2-4d	female	WT	LacO-Vasp-EGFP; LacI::Rhi	oxidized	NA
SRR1024329	Drosophila melanogaster	SAMN02393667	ovary	2-4d	female	WT	LacO-Vasp-EGFP; LacI::Rhi	oxidized	NA
SRR1024330	Drosophila melanogaster	SAMN02393668	ovary	14-16d	female	WT	LacO-Vasp-EGFP/EGFP-Vasp-LacO; LacI	oxidized	NA
SRR1024331	Drosophila melanogaster	SAMN02393668	ovary	14-16d	female	WT	LacO-Vasp-EGFP/EGFP-Vasp-LacO; LacI	oxidized	NA
SRR1024332	Drosophila melanogaster	SAMN02393669	ovary	14-16d	female	WT	LacO-Vasp-EGFP/EGFP-Vasp-LacO; LacI::Rhi	oxidized	NA
SRR1024333	Drosophila melanogaster	SAMN02393669	ovary	14-16d	female	WT	LacO-Vasp-EGFP/EGFP-Vasp-LacO; LacI::Rhi	oxidized	NA
SRR1024334	Drosophila melanogaster	SAMN02393670	ovary	2-4d	female	WT	LacO-Vasp-EGFP/EGFP-Vasp-LacO; LacI	oxidized	NA
SRR1024335	Drosophila melanogaster	SAMN02393670	ovary	2-4d	female	WT	LacO-Vasp-EGFP/EGFP-Vasp-LacO; LacI	oxidized	NA
SRR1024336	Drosophila melanogaster	SAMN02393671	ovary	2-4d	female	WT	LacO-Vasp-EGFP/EGFP-Vasp-LacO; LacI::Rhi	oxidized	NA
SRR1024337	Drosophila melanogaster	SAMN02393671	ovary	2-4d	female	WT	LacO-Vasp-EGFP/EGFP-Vasp-LacO; LacI::Rhi	oxidized	NA
SRR1024339	Drosophila melanogaster	SAMN02393672	ovary	2-4d	female	WT	LacO-Vasp-EGFP/EGFP-Vasp-LacO; LacI	NA	NA
SRR1024341	Drosophila melanogaster	SAMN02393683	ovary	2-4d	female	WT	LacO-Vasp-EGFP/EGFP-Vasp-LacO; LacI::Rhi	NA	NA
SRR1025002	Drosophila melanogaster	SAMN02393685	ovary	2-4d	female	WT	LacO-Vasp-EGFP; LacI	NA	NA
SRR1025003	Drosophila melanogaster	SAMN02393687	ovary	2-4d	female	WT	LacO-Vasp-EGFP; LacI::Rhi	NA	NA
SRR1042403	Drosophila melanogaster	SAMN02434678	head	3d	male	WT	5905	NA	NA
SRR1042404	Drosophila melanogaster	SAMN02434683	head	30d	male	WT	5905	oxidized	NA
SRR1042405	Drosophila melanogaster	SAMN02434682	head	3d	male	WT	5905	NA	NA
SRR1042406	Drosophila melanogaster	SAMN02434685	head	30d	male	WT	5905	oxidized	NA
SRR1042407	Drosophila melanogaster	SAMN02434681	body	3d; whole	male	WT	FLAG-HA-Ago2	NA	AGO1
SRR1042408	Drosophila melanogaster	SAMN02434679	body	30d; whole	male	WT	FLAG-HA-Ago2	NA	AGO1
SRR1042409	Drosophila melanogaster	SAMN02434680	body	3d; whole	male	WT	FLAG-HA-Ago2	NA	AGO2
SRR1042410	Drosophila melanogaster	SAMN02434684	body	30d; whole	male	WT	FLAG-HA-Ago2	NA	AGO2
SRR1043607	Drosophila melanogaster	SAMN02437208	ovary	3d	female	Su(var)3-7	het	NA	NA
SRR1043608	Drosophila melanogaster	SAMN02437207	ovary	3d	female	Su(var)3-7	hom	NA	NA
SRR111893	Drosophila melanogaster	SAMN00216522	S2	S2 naive cells	NA	S2R supernatant	NA	NA	NA
SRR1169032	Drosophila melanogaster	SAMN02628951	ovary	NA	female	Lhr	hom	NA	NA
SRR1169137	Drosophila melanogaster	SAMN02628952	ovary	NA	female	Lhr	het	NA	NA
SRR1205790	Drosophila simulans	SAMN02708806	body	abdomen and thorax	male	WT	NA	NA	NA
SRR1259518	Drosophila melanogaster	SAMN02732480	larva	3d; salivary glands	male	WT	Oregon-R	NA	NA
SRR1259519	Drosophila melanogaster	SAMN02732478	larva	3d; salivary glands	female	WT	Oregon-R	NA	NA
SRR1259520	Drosophila melanogaster	SAMN02732475	head	1-2d	male	WT	Oregon-R	NA	NA
SRR1259521	Drosophila melanogaster	SAMN02732479	head	1-2d	female	WT	Oregon-R	NA	NA
SRR1259522	Drosophila melanogaster	SAMN02732477	body	1-2d; no head	male	WT	Oregon-R	NA	NA
SRR1259523	Drosophila melanogaster	SAMN02732476	body	1-2d; no head	female	WT	Oregon-R	NA	NA
SRR1297208	Drosophila melanogaster	SAMN02797970	S2	NA	NA	WT	NA	NA	NA
SRR1323562	Drosophila melanogaster	SAMN02797970	S2	NA	NA	WT	NA	LS454	AGO1
SRR1323601	Drosophila melanogaster	SAMN02797970	S2	NA	NA	WT	NA	LS454	NA
SRR1323602	Drosophila melanogaster	SAMN02797970	S2	NA	NA	WT	NA	LS454	NA
SRR1434932	Drosophila melanogaster	SAMN02869565	ovary	3-5d	female	WT	w1	NA	AUB
SRR1434933	Drosophila melanogaster	SAMN02869566	ovary	3-5d	female	WT	w1	NA	AGO3
SRR1435859	Drosophila melanogaster	SAMN02869568	ovary	3-5d	female	ago3 rescued	w1; aub>Ago3[ADH]/vas>Ago3[ADH]; ago3[t2]/ago3[t3]	NA	AGO3
SRR1435981	Drosophila melanogaster	SAMN02869569	ovary	3-5d	female	ago3 rescued	w1; nos>Gal4/UAS-Ago3[ADH]; ago3[t2]/ago3[t3]	NA	AUB
SRR1436084	Drosophila melanogaster	SAMN02869570	ovary	3-5d	female	ago3 rescued	w1; nos>Gal4/UAS-Ago3[ADH]; ago3[t2]/ago3[t3]	NA	AGO3
SRR1436712	Drosophila melanogaster	SAMN02869567	ovary	3-5d	female	ago3 rescued	w1; aub>Ago3[ADH]/vas>Ago3[ADH]; ago3[t2]/ago3[t3]	NA	AUB
SRR1524964	Drosophila melanogaster	SAMN02940621	ovary	1-2w	NA	maternal deposition (MD) cross	MD; female P-1152 cross to male BC69	NA	PIWI
SRR1524965	Drosophila melanogaster	SAMN02940622	ovary	1-2w	NA	No maternak deposition (NMD) cross	NMD; male P-1152 cross to female P-1152	NA	PIWI
SRR1524966	Drosophila melanogaster	SAMN02940623	ovary	1-2w	NA	maternal deposition (MD) cross	MD; female P-1152 cross to male BC69	NA	AUB
SRR1524967	Drosophila melanogaster	SAMN02940624	ovary	1-2w	NA	No maternak deposition (NMD) cross	NMD; male P-1152 cross to female P-1152	NA	AUB
SRR1524968	Drosophila melanogaster	SAMN02940625	ovary	1-2w	NA	maternal deposition (MD) cross	MD; female P-1152 cross to male BC69	NA	AGO3
SRR1524969	Drosophila melanogaster	SAMN02940626	ovary	1-2w	NA	No maternak deposition (NMD) cross	NMD; male P-1152 cross to female P-1152	NA	AGO3
SRR1524970	Drosophila melanogaster	SAMN02940627	ovary	1-2w	NA	maternal deposition (MD) cross	MD; female P-1152 cross to male BC69	NA	NA
SRR1524971	Drosophila melanogaster	SAMN02940628	ovary	1-2w	NA	No maternak deposition (NMD) cross	NMD; male P-1152 cross to female P-1152	NA	NA
SRR1524972	Drosophila melanogaster	SAMN02940629	ovary	1-2w	NA	parental P1152	parental P1152	NA	NA
SRR1524973	Drosophila melanogaster	SAMN02940630	ovary	1-2w	NA	parental BC69	parental BC69	NA	NA
SRR1568355	Drosophila melanogaster	SAMN03020457	ovary	3-6d	female	WT	w[1]	NA	NA
SRR1568356	Drosophila melanogaster	SAMN03020458	ovary	3-6d	female	aub	w[1]; aub[HN2]/aub[QC42]	NA	NA
SRR1568357	Drosophila melanogaster	SAMN03020459	ovary	3-6d	female	ago3	w[1]; ago3[t2]/ago3[t3]	NA	NA
SRR1568358	Drosophila melanogaster	SAMN03020460	ovary	3-6d	female	aub; ago3	w[1]; aub[HN2]/aub[QC42]; ago3[t2]/ago3[t3]	NA	NA
SRR1568359	Drosophila melanogaster	SAMN03020461	ovary	3-6d	female	zuc	w[1]/+; zuc[HM27]/Df(2L)Prl	NA	NA
SRR1568759	Drosophila melanogaster	SAMN03020466	ovary	3-6d	female	WT	w[1]	NA	PIWI
SRR1568760	Drosophila melanogaster	SAMN03020467	ovary	3-6d	female	WT	w[1]	NA	AUB
SRR1568761	Drosophila melanogaster	SAMN03020468	ovary	3-6d	female	WT	w[1]	NA	AGO3
SRR1592120	Drosophila melanogaster	SAMN03083635	larva	3d	male	WT	ectopic ds 1.688 RNA	NA	NA
SRR1592121	Drosophila melanogaster	SAMN03083636	larva	3d	male	WT	ectopic ds 1.688 RNA	NA	NA
SRR1592122	Drosophila melanogaster	SAMN03083637	larva	3d	male	WT	laboratory reference strain	NA	NA
SRR1592123	Drosophila melanogaster	SAMN03083638	larva	3d	male	WT	laboratory reference strain	NA	NA
SRR1593702	Drosophila melanogaster	SAMN03085449	egg	unfertilized egg 0-2h	NA	WT	w1118	NA	NA
SRR1593703	Drosophila melanogaster	SAMN03085450	egg	unfertilized egg 0-2h	NA	wispy	KG5287	NA	NA
SRR1593704	Drosophila melanogaster	SAMN03085451	embryo	0-0.25h	NA	WT	w1118	NA	NA
SRR1593705	Drosophila melanogaster	SAMN03085452	embryo	0.25-0.5h	NA	WT	w1118	NA	NA
SRR1593706	Drosophila melanogaster	SAMN03085453	embryo	0.5-0.75h	NA	WT	w1118	NA	NA
SRR1593707	Drosophila melanogaster	SAMN03085454	embryo	0.75-1h	NA	WT	w1118	NA	NA
SRR1593708	Drosophila melanogaster	SAMN03085455	embryo	1-1.5h	NA	WT	w1118	NA	NA
SRR1593709	Drosophila melanogaster	SAMN03085456	embryo	1.5-2h	NA	WT	w1118	NA	NA
SRR1593710	Drosophila melanogaster	SAMN03085457	embryo	2-2.5h	NA	WT	w1118	NA	NA
SRR1593711	Drosophila melanogaster	SAMN03085458	embryo	2.5-3h	NA	WT	w1118	NA	NA
SRR1593712	Drosophila melanogaster	SAMN03085459	embryo	3-4h	NA	WT	w1118	NA	NA
SRR1593713	Drosophila melanogaster	SAMN03085460	embryo	4-6h	NA	WT	w1118	NA	NA
SRR1593718	Drosophila melanogaster	SAMN03085465	embryo	0-1h	NA	WT	w1118	NA	NA
SRR1593719	Drosophila melanogaster	SAMN03085466	embryo	2-3h	NA	WT	w1118	NA	NA
SRR1593720	Drosophila melanogaster	SAMN03085467	embryo	5-6h	NA	WT	w1118	NA	NA
SRR1593721	Drosophila melanogaster	SAMN03085468	embryo	11-12h	NA	WT	w1118	NA	NA
SRR1593722	Drosophila melanogaster	SAMN03085469	egg	unfertilized egg 0-3h	NA	WT	w1118	NA	NA
SRR1617561	Drosophila melanogaster	SAMN03121859	ovary	follicle cell	female	WT	Oregon-R	NA	NA
SRR1617562	Drosophila melanogaster	SAMN03121858	ovary	follicle cell	female	tj	NA	NA	NA
SRR1617563	Drosophila melanogaster	SAMN03121864	ovary	follicle cell	female	tj	NA	NA	NA
SRR1686767	Drosophila melanogaster	SAMN03247108	ovary	2-4d	female	WT	40AA_germline_clone	NA	NA
SRR1686795	Drosophila melanogaster	SAMN03247109	ovary	2-4d	female	ald	Ald17A_germline_clone	NA	NA
SRR1686809	Drosophila melanogaster	SAMN03247110	ovary	2-4d	female	eno	Eno_germline_clone	NA	NA
SRR1686815	Drosophila melanogaster	SAMN03247111	ovary	2-4d	female	WT	frt82bA_germline_clone	NA	NA
SRR1686817	Drosophila melanogaster	SAMN03247112	ovary	2-4d	female	pyk	Pyk3A_germline_clone	NA	NA
SRR2046459	Drosophila melanogaster	SAMN03754038	testis	gonioblasts	male	WT	NA	NA	NA
SRR2046460	Drosophila melanogaster	SAMN03754039	testis	gonioblasts	male	WT	NA	NA	NA
SRR2046461	Drosophila melanogaster	SAMN03754040	testis	primary spermatocytes	male	WT	NA	NA	NA
SRR2046462	Drosophila melanogaster	SAMN03754041	testis	primary spermatocytes	male	WT	NA	NA	NA
SRR2046463	Drosophila melanogaster	SAMN03754042	testis	gonioblasts to mature sperms	male	WT	NA	NA	NA
SRR2147099	Drosophila melanogaster	SAMN03979063	ovary	4-6d	female	ago3	ago3 sh attP2	NA	NA
SRR2147100	Drosophila melanogaster	SAMN03979064	ovary	4-6d	female	aub; gao3	aubsh1 attp40 ago3 sh attP2	NA	NA
SRR2147101	Drosophila melanogaster	SAMN03979065	ovary	4-6d	female	WT	white sh attP2 (control)	NA	PIWI
SRR2147102	Drosophila melanogaster	SAMN03979066	ovary	4-6d	female	WT	white sh attP2 (control)	NA	AUB
SRR2147103	Drosophila melanogaster	SAMN03979067	ovary	4-6d	female	WT	white sh attP2 (control)	NA	AGO3
SRR2147104	Drosophila melanogaster	SAMN03979068	ovary	4-6d	female	piwi	piwi sh2 attP2	NA	PIWI
SRR2147105	Drosophila melanogaster	SAMN03979069	ovary	4-6d	female	piwi	piwi sh2 attP2	NA	AUB
SRR2147106	Drosophila melanogaster	SAMN03979070	ovary	4-6d	female	piwi	piwi sh2 attP2	NA	AGO3
SRR2147107	Drosophila melanogaster	SAMN03979071	ovary	4-6d	female	aub	aub sh1 attP2	NA	PIWI
SRR2147108	Drosophila melanogaster	SAMN03979072	ovary	4-6d	female	aub	aub sh1 attP2	NA	AGO3
SRR2147109	Drosophila melanogaster	SAMN03979073	ovary	4-6d	female	ago3	ago3 sh attP2	NA	PIWI
SRR2147110	Drosophila melanogaster	SAMN03979074	ovary	4-6d	female	ago3	ago3 sh attP2	NA	AUB
SRR2147111	Drosophila melanogaster	SAMN03979075	ovary	4-6d	female	WT	GFP-Piwi BAC transgene / w1118	NA	PIWI
SRR2147112	Drosophila melanogaster	SAMN03979572	ovary	4-6d	female	aub	aub sh attP2 nanos-GFP-Piwi attP40	NA	PIWI
SRR2147113	Drosophila melanogaster	SAMN03979076	ovary	4-6d	female	ago3	ago3 sh attP2 nanos-GFP-Piwi attP40	NA	PIWI
SRR2147114	Drosophila melanogaster	SAMN03979077	ovary	4-6d	female	aub; gao3	aubsh1 attP33 ago3 sh attP2 nanos-GFP-Piwi attP40	NA	PIWI
SRR2147115	Drosophila melanogaster	SAMN03979573	ovary	4-6d	female	WT	white sh attP2 (control) nanos-GFP-Piwi attP40	NA	PIWI
SRR2147116	Drosophila melanogaster	SAMN03979574	ovary	4-6d	female	aub	aub sh attP2 nanos-GFP-Piwi attP40	NA	PIWI
SRR2147117	Drosophila melanogaster	SAMN03979575	ovary	4-6d	female	ago3	ago3 sh attP2 nanos-GFP-Piwi attP40	NA	PIWI
SRR2147118	Drosophila melanogaster	SAMN03979576	ovary	4-6d	female	WT	white sh attP2 (control) nanos-GFP-Piwi attP40	NA	PIWI
SRR2147119	Drosophila melanogaster	SAMN03979577	ovary	4-6d	female	aub; ago3	aubsh1 attP33 ago3 sh attP2 nanos-GFP-Piwi attP40	NA	PIWI
SRR2149846	Drosophila melanogaster	SAMN03979685	ovary	4-6d	female	aub; ago3	aubsh1 attP33 ago3 sh attP2 nanos-GFP-Piwi attP40	NA	PIWI
SRR2549640	Drosophila melanogaster	SAMN03754043	testis	gonioblasts to mature sperms	male	WT	NA	NA	NA
SRR2549641	Drosophila melanogaster	SAMN03754044	testis	gonioblasts to mature sperms	male	WT	NA	NA	NA
SRR2549642	Drosophila melanogaster	SAMN03754045	testis	gonioblasts to mature sperms	male	WT	NA	NA	NA
SRR2549643	Drosophila melanogaster	SAMN03754046	testis	gonioblasts to mature sperms	male	WT	NA	NA	NA
SRR287597	Drosophila melanogaster	SAMN00627945	ovary	2-4d	female	qin	het	NA	NA
SRR287598	Drosophila melanogaster	SAMN00627946	ovary	2-4d	female	qin	hom	NA	NA
SRR287599	Drosophila melanogaster	SAMN00627946	ovary	2-4d	female	qin	hom	NA	AGO3
SRR287600	Drosophila melanogaster	SAMN00627945	ovary	2-4d	female	qin	het	NA	AUB
SRR287601	Drosophila melanogaster	SAMN00627945	ovary	2-4d	female	qin	het	NA	AGO3
SRR287602	Drosophila melanogaster	SAMN00627946	ovary	2-4d	female	qin	hom	NA	AUB
SRR287603	Drosophila melanogaster	SAMN00627945	ovary	2-4d	female	qin	het	NA	PIWI
SRR287604	Drosophila melanogaster	SAMN00627946	ovary	2-4d	female	qin	hom	NA	PIWI
SRR317110	Drosophila melanogaster	SAMN00690250	ovary	5-6d	female	armi	het	NA	NA
SRR317111	Drosophila melanogaster	SAMN00690251	ovary	5-6d	female	armi	hom	NA	NA
SRR317112	Drosophila melanogaster	SAMN00690252	ovary	5-6d	female	CG4771	het	NA	NA
SRR317113	Drosophila melanogaster	SAMN00690253	ovary	5-6d	female	CG4771	hom	NA	NA
SRR317114	Drosophila melanogaster	SAMN00690254	ovary	5-6d	female	fs(1)yb	het	NA	NA
SRR317115	Drosophila melanogaster	SAMN00690255	ovary	5-6d	female	fs(1)yb	hom	NA	NA
SRR317116	Drosophila melanogaster	SAMN00690256	ovary	5-6d	female	zuc	het	NA	NA
SRR317117	Drosophila melanogaster	SAMN00690257	ovary	5-6d	female	zuc	hom	NA	NA
SRR333505	Drosophila melanogaster	SAMN00713651	ovary	2-4d	female	w1 x Har	NA	NA	NA
SRR333506	Drosophila melanogaster	SAMN00713656	ovary	21d	female	w1 x Har	NA	NA	NA
SRR333507	Drosophila melanogaster	SAMN00713657	ovary	2-4d	female	Har x w	NA	NA	NA
SRR333509	Drosophila melanogaster	SAMN00713658	ovary	21d	female	Har x w	NA	NA	NA
SRR351332	Drosophila melanogaster	SAMN00738180	body	2-3d; whole	male:female = 1:1	WT	5905	NA	NA
SRR351333	Drosophila melanogaster	SAMN00738181	body	2-3d; whole	male:female = 1:1	nbr	nbr[f02257]	NA	NA
SRR3729577	Drosophila melanogaster	SAMN05326587	ovary	NA	female	WT	w1118; UAS-Wts-RNAi,UAS- RasV12	NA	NA
SRR3729578	Drosophila melanogaster	SAMN05326583	OSS	NA	NA	WT	w[1118]; P [w+ hsp-70 bam+] 11-d bam[D86] ry e/d bam[D86] P[ovo-lacZ) P[vas-egfp]	NA	NA
SRR3729579	Drosophila melanogaster	SAMN05326584	WRR-1	NA	NA	wts; ectopic Ras	w1118; Act-5C-GAL4,UAS-Wts-RNAi,UAS- RasV12	NA	NA
SRR3729580	Drosophila melanogaster	SAMN05326585	OSS	NA	NA	WT	w[1118]; P [w+ hsp-70 bam+] 11-d bam[D86] ry e/d bam[D86] P[ovo-lacZ) P[vas-egfp]	NA	PIWI
SRR3729581	Drosophila melanogaster	SAMN05326586	OSS	NA	NA	WT	w[1118]; P [w+ hsp-70 bam+] 11-d bam[D86] ry e/d bam[D86] P[ovo-lacZ) P[vas-egfp]	NA	PIWI
SRR3729582	Drosophila melanogaster	SAMN05326588	WRR-1	NA	NA	wts; ectopic Ras	w1118; Act-5C-GAL4,UAS-Wts-RNAi,UAS- RasV12	NA	PIWI
SRR3729583	Drosophila melanogaster	SAMN05326589	WRR-1	NA	NA	wts; ectopic Ras	w1118; Act-5C-GAL4,UAS-Wts-RNAi,UAS- RasV12	NA	PIWI
SRR3729584	Drosophila melanogaster	SAMN05326590	WRR-1	NA	NA	wts; ectopic Ras	w1118; Act-5C-GAL4,UAS-Wts-RNAi,UAS- RasV12;gfp dsRNA	NA	NA
SRR3729585	Drosophila melanogaster	SAMN05326591	WRR-1	NA	NA	wts; ectopic Ras	w1118; Act-5C-GAL4,UAS-Wts-RNAi,UAS- RasV12;gfp dsRNA	NA	NA
SRR3729586	Drosophila melanogaster	SAMN05326592	WRR-1	NA	NA	wts; ectopic Ras; piwi	w1118; Act-5C-GAL4,UAS-Wts-RNAi,UAS- RasV12; piwi dsRNA	NA	NA
SRR3729587	Drosophila melanogaster	SAMN05326593	WRR-1	NA	NA	wts; ectopic Ras; piwi	w1118; Act-5C-GAL4,UAS-Wts-RNAi,UAS- RasV12; piwi dsRNA	NA	NA
SRR3729588	Drosophila melanogaster	SAMN05326594	WRR-1	NA	NA	wts; ectopic Ras; zuc	w1118; Act-5C-GAL4,UAS-Wts-RNAi,UAS- RasV12; zuc dsRNA	NA	NA
SRR3729589	Drosophila melanogaster	SAMN05326595	WRR-1	NA	NA	wts; ectopic Ras; zuc	w1118; Act-5C-GAL4,UAS-Wts-RNAi,UAS- RasV12; zuc dsRNA	NA	NA
SRR3729590	Drosophila melanogaster	SAMN05326596	WRR-1	NA	NA	wts; ectopic Ras; armi	w1118; Act-5C-GAL4,UAS-Wts-RNAi,UAS- RasV12; armi dsRNA	NA	NA
SRR3729591	Drosophila melanogaster	SAMN05326597	WRR-1	NA	NA	wts; ectopic Ras; armi	w1118; Act-5C-GAL4,UAS-Wts-RNAi,UAS- RasV12; armi dsRNA	NA	NA
SRR3729592	Drosophila melanogaster	SAMN05326598	WRR-1	NA	NA	wts; ectopic Ras; aub	w1118; Act-5C-GAL4,UAS-Wts-RNAi,UAS- RasV12; aub dsRNA	NA	NA
SRR3729593	Drosophila melanogaster	SAMN05326599	WRR-1	NA	NA	wts; ectopic Ras; aub	w1118; Act-5C-GAL4,UAS-Wts-RNAi,UAS- RasV12; aub dsRNA	NA	NA
SRR3729594	Drosophila melanogaster	SAMN05326600	WRR-1	NA	NA	wts; ectopic Ras; ago3	w1118; Act-5C-GAL4,UAS-Wts-RNAi,UAS- RasV12; ago3 dsRNA	NA	NA
SRR387503	Drosophila melanogaster	SAMN00761644	ovary	NA	female	WT	NA	NA	NA
SRR387504	Drosophila melanogaster	SAMN00761645	ovary	NA	female	piwi	piwi1	NA	NA
SRR387505	Drosophila melanogaster	SAMN00761646	ovary	NA	female	WT	NA	NA	PIWI
SRR387506	Drosophila melanogaster	SAMN00761647	ovary	NA	female	piwi	piwi1	NA	PIWI
SRR407284	Drosophila melanogaster	SAMN00783874	ovary	NA	female	WT	w1118	NA	NA
SRR407285	Drosophila melanogaster	SAMN00783875	ovary	NA	female	uap56	NA	NA	NA
SRR407286	Drosophila melanogaster	SAMN00783875	ovary	NA	female	uap56	NA	NA	NA
SRR407287	Drosophila melanogaster	SAMN00783876	ovary	NA	female	uap56	NA	oxidized	NA
SRR407288	Drosophila melanogaster	SAMN00783876	ovary	NA	female	uap56	NA	oxidized	NA
SRR412199	Drosophila melanogaster	SAMN00791492	body	10d; whole without testis	male	Dnmt2	het	control	NA
SRR412200	Drosophila melanogaster	SAMN00791493	body	10d; whole without testis	male	Dnmt2	het	hs	NA
SRR412201	Drosophila melanogaster	SAMN00791494	body	12d; whole without testis	male	Dnmt2	het	recovery	NA
SRR412202	Drosophila melanogaster	SAMN00791495	body	10d; whole without testis	male	Dnmt2	hom	control	NA
SRR412203	Drosophila melanogaster	SAMN00791496	body	10d; whole without testis	male	Dnmt2	hom	hs	NA
SRR412204	Drosophila melanogaster	SAMN00791497	body	12d; whole without testis	male	Dnmt2	hom	recovery	NA
SRR445490	Drosophila melanogaster	SAMN00828792	S2	S2p	NA	WT	NA	NA	NA
SRR445491	Drosophila melanogaster	SAMN00828792	S2	S2p	NA	WT	NA	NA	NA
SRR445492	Drosophila melanogaster	SAMN00828792	S2	S2p	NA	WT	NA	NA	NA
SRR445493	Drosophila melanogaster	SAMN00828792	S2	S2p	NA	WT	NA	NA	NA
SRR445494	Drosophila melanogaster	SAMN00828792	S2	S2p	NA	WT	NA	NA	NA
SRR445495	Drosophila melanogaster	SAMN00828792	S2	S2p	NA	WT	NA	NA	NA
SRR445496	Drosophila melanogaster	SAMN00828792	S2	S2p	NA	WT	NA	NA	NA
SRR458496	Drosophila melanogaster	SAMN00849945	S2	NA	NA	WT	NA	mir-transfections	NA
SRR458497	Drosophila melanogaster	SAMN00849945	S2	NA	NA	WT	NA	mock	NA
SRR488370	Drosophila melanogaster	SAMN01096851	Sg4	late embryo	NA	WT	Sg4	NA	NA
SRR488371	Drosophila melanogaster	SAMN01096859	ML-DmBG1-c1	3d larva	CNS-derived	WT	ML-DmBG1-c1	NA	NA
SRR488372	Drosophila melanogaster	SAMN01096877	ML-DmBG3-c2	3d larva	CNS-derived	WT	ML-DmBG3-c2	NA	NA
SRR488693	Drosophila melanogaster	SAMN01096876	S2-DRSC	late embryo	NA	WT	S2-DRSC	NA	NA
SRR488694	Drosophila melanogaster	SAMN01096875	ML-DmD9	3d larva	dorsal mesothoracic disc	WT	ML-DmD9	NA	NA
SRR488696	Drosophila melanogaster	SAMN01096880	ML-DmD32	3d larva	dorsal mesothoracic disc	WT	ML-DmD32	NA	NA
SRR488697	Drosophila melanogaster	SAMN01096880	ML-DmD32	3d larva	dorsal mesothoracic disc	WT	ML-DmD32	NA	NA
SRR488698	Drosophila melanogaster	SAMN01096949	1182-4H	late embryo	NA	WT	1182-4H	NA	NA
SRR498250	Drosophila melanogaster	SAMN00860221	head	NA	female	WT	wIR	NA	NA
SRR498251	Drosophila melanogaster	SAMN00860222	head	NA	female	loqs	wIR: loqsKO; loqs-PA/TM3	NA	NA
SRR498252	Drosophila melanogaster	SAMN00860223	head	NA	female	loqs	wIR: loqsKO; loqs-PB/TM3	NA	NA
SRR498253	Drosophila melanogaster	SAMN00860224	head	NA	female	loqs	wIR: loqsKO; loqs-PA, loqs-PB/TM3	NA	NA
SRR498254	Drosophila melanogaster	SAMN00860225	head	NA	female	loqs	wIR: loqsKO; loqs-PA, loqs-PD/TM3	NA	NA
SRR498255	Drosophila melanogaster	SAMN00860226	head	NA	female	loqs	wIR: loqsKO; loqs-PB, loqs-PD/TM3	NA	NA
SRR498256	Drosophila melanogaster	SAMN00860227	head	NA	female	loqs	wIR: loqsKO; loqs-PA, loqs-PB, loqs-PD/TM3	NA	NA
SRR498257	Drosophila melanogaster	SAMN00860228	head	NA	female	loqs	wIR: loqsKO/CyO	NA	NA
SRR498258	Drosophila melanogaster	SAMN00860229	head	NA	female	loqs	wIR: loqsf00791	NA	NA
SRR498259	Drosophila melanogaster	SAMN00860230	head	NA	female	loqs	wIR: loqsf00791/CyO	NA	NA
SRR498260	Drosophila melanogaster	SAMN00860231	ovary	NA	female	WT	w1118	NA	NA
SRR498261	Drosophila melanogaster	SAMN00860232	ovary	NA	female	loqs	w1118: loqsKO; loqs-PA/TM3	NA	NA
SRR498262	Drosophila melanogaster	SAMN00860233	ovary	NA	female	loqs	w1118: loqsKO; loqs-PB/TM3	NA	NA
SRR498263	Drosophila melanogaster	SAMN00860234	ovary	NA	female	loqs	w1118: loqsKO; loqs-PA, loqs-PB/TM3	NA	NA
SRR498264	Drosophila melanogaster	SAMN00860235	ovary	NA	female	loqs	w1118: loqsKO; loqs-PA, loqs-PD/TM3	NA	NA
SRR498265	Drosophila melanogaster	SAMN00860236	ovary	NA	female	loqs	w1118: loqsKO; loqs-PB, loqs-PD/TM3	NA	NA
SRR498266	Drosophila melanogaster	SAMN00860237	ovary	NA	female	loqs	w1118: loqsKO; loqs-PA, loqs-PB, loqs-PD/TM3	NA	NA
SRR498267	Drosophila melanogaster	SAMN00860238	ovary	NA	female	loqs	w1118: loqsKO/CyO	NA	NA
SRR498268	Drosophila melanogaster	SAMN00860239	ovary	NA	female	loqs	w1118: loqsf00791	NA	NA
SRR498269	Drosophila melanogaster	SAMN00860240	ovary	NA	female	loqs	w1118: loqsf00791/CyO	NA	NA
SRR507883	Drosophila melanogaster	SAMN01047946	ovary	NA	female	WT	#1 T1/	NA	NA
SRR508492	Drosophila melanogaster	SAMN01047947	ovary	NA	female	WT	#2 /T1	NA	NA
SRR508550	Drosophila melanogaster	SAMN01047948	ovary	NA	female	WT	#3 P1152/	NA	NA
SRR513095	Drosophila melanogaster	SAMN01047950	ovary	NA	female	WT	#5 P1152/P1152	NA	NA
SRR513097	Drosophila melanogaster	SAMN01047949	ovary	NA	female	WT	#4 BX2/	NA	NA
SRR513100	Drosophila melanogaster	SAMN01047951	ovary	NA	female	WT	#6 BX2*G2	NA	NA
SRR513102	Drosophila melanogaster	SAMN01047952	ovary	NA	female	WT	#7 BX2*G42	NA	NA
SRR513103	Drosophila melanogaster	SAMN01047953	ovary	NA	female	WT	#8 BX2*2G36/	NA	NA
SRR513384	Drosophila melanogaster	SAMN01048377	ovary	5-6d	female	WT	MTD>w-	NA	NA
SRR513385	Drosophila melanogaster	SAMN01048378	ovary	5-6d	female	WT	MTD>GFP shRNA	NA	NA
SRR513386	Drosophila melanogaster	SAMN01048379	ovary	5-6d	female	armi	MTD>armi shRNA	NA	NA
SRR513387	Drosophila melanogaster	SAMN01048380	ovary	5-6d	female	zuc	MTD>zuc shRNA	NA	NA
SRR513388	Drosophila melanogaster	SAMN01048381	ovary	5-6d	female	piwi	MTD>piwi shRNA	NA	NA
SRR513389	Drosophila melanogaster	SAMN01048382	ovary	5-6d	female	vas	MTD>vas shRNA	NA	NA
SRR513390	Drosophila melanogaster	SAMN01048383	ovary	5-6d	female	aub	MTD>aub shRNA	NA	NA
SRR513391	Drosophila melanogaster	SAMN01048384	ovary	5-6d	female	vret	MTD>vret shRNA	NA	NA
SRR513392	Drosophila melanogaster	SAMN01048385	ovary	5-6d	female	shu; ectopic dcr-2	UAS-Dcr-2;NGT;nanosGAL4>shu RNAi	NA	NA
SRR513393	Drosophila melanogaster	SAMN01048386	OSC	NA	NA	WT	act>FLAG_HA_Piwi	NA	PIWI
SRR513394	Drosophila melanogaster	SAMN01048387	OSC	NA	NA	WT	act>FLAG_HA_Aub	NA	AUB
SRR513395	Drosophila melanogaster	SAMN01048388	ovary	5-6d	female	shu	shu[1]/CyO hets and shu[Def]/CyO hets. mixed	NA	NA
SRR513396	Drosophila melanogaster	SAMN01048389	ovary	5-6d	female	shu	shu[1]/shu[Def	NA	NA
SRR513901	Drosophila melanogaster	SAMN01054457	head	NA	male	WT	w1118	NA	NA
SRR513981	Drosophila melanogaster	SAMN01055157	body	thorax	male	WT	w1118	NA	NA
SRR513989	Drosophila melanogaster	SAMN01055160	body	abdomen and thorax	male	WT	w1118	NA	NA
SRR513990	Drosophila melanogaster	SAMN01055160	body	abdomen and thorax	male	WT	w1118	NA	NA
SRR513992	Drosophila melanogaster	SAMN01055160	body	abdomen and thorax	male	WT	w1118	NA	NA
SRR513993	Drosophila melanogaster	SAMN01055160	body	abdomen and thorax	male	WT	w1118	NA	NA
SRR515090	Drosophila melanogaster	SAMN01054457	head	NA	male	WT	w1118	NA	NA
SRR516398	Drosophila melanogaster	SAMN01081677	S2	NA	NA	WT	pKF63 BamHI cut	NA	NA
SRR516399	Drosophila melanogaster	SAMN01081678	S2	NA	NA	WT	pKF63 circular	NA	NA
SRR516400	Drosophila melanogaster	SAMN01081679	S2	NA	NA	WT	pKF63 SacI cut	NA	NA
SRR516401	Drosophila melanogaster	SAMN01081680	S2	NA	NA	WT	pKF63 NotI cut	NA	NA
SRR516402	Drosophila melanogaster	SAMN01081681	S2	NA	NA	WT	pKF63 EcoRI cut	NA	NA
SRR516403	Drosophila melanogaster	SAMN01081682	S2	NA	NA	WT	pKF63 AlwI cut	NA	NA
SRR516404	Drosophila melanogaster	SAMN01081683	S2	NA	NA	WT	NA	NA	NA
SRR566977	Drosophila melanogaster	SAMN01163906	ovary	3d	female	WT	MG derived	NA	NA
SRR566978	Drosophila melanogaster	SAMN01163907	ovary	3d	female	WT	MG derived	anion-exchange chromatography purification with AKTA apparatus	NA
SRR566979	Drosophila melanogaster	SAMN01163908	ovary	3d	female	WT	MG derived	manual anion-exchange chromatography purification	NA
SRR572404	Drosophila melanogaster	SAMN01178449	head	NA	NA	WT	Canton S	ZT0	NA
SRR572405	Drosophila melanogaster	SAMN01178450	head	NA	NA	WT	Canton S	ZT4	NA
SRR572406	Drosophila melanogaster	SAMN01178451	head	NA	NA	WT	Canton S	ZT8	NA
SRR572407	Drosophila melanogaster	SAMN01178452	head	NA	NA	WT	Canton S	ZT12	NA
SRR572408	Drosophila melanogaster	SAMN01178453	head	NA	NA	WT	Canton S	ZT16	NA
SRR572409	Drosophila melanogaster	SAMN01178454	head	NA	NA	WT	Canton S	ZT20	NA
SRR605747	Drosophila melanogaster	SAMN01779572	ovary	NA	NA	WT	1.9	NA	NA
SRR605748	Drosophila melanogaster	SAMN01779573	ovary	NA	NA	WT	2.1	NA	NA
SRR605749	Drosophila melanogaster	SAMN01779574	ovary	NA	NA	WT	2.3	NA	NA
SRR605750	Drosophila melanogaster	SAMN01779575	ovary	NA	NA	WT	2.6	NA	NA
SRR605751	Drosophila melanogaster	SAMN01779576	ovary	NA	NA	WT	2.1	NA	NA
SRR605752	Drosophila melanogaster	SAMN01779577	ovary	NA	NA	WT	3.1	NA	NA
SRR605753	Drosophila melanogaster	SAMN01779578	ovary	NA	NA	WT	3.6	NA	NA
SRR605754	Drosophila melanogaster	SAMN01779579	ovary	NA	NA	WT	3.9	NA	NA
SRR605755	Drosophila melanogaster	SAMN01779580	ovary	NA	NA	WT	3.1	NA	NA
SRR605756	Drosophila melanogaster	SAMN01779581	ovary	NA	NA	WT	62.5.2	NA	NA
SRR605757	Drosophila melanogaster	SAMN01779582	ovary	NA	NA	WT	67.2.1	NA	NA
SRR605758	Drosophila melanogaster	SAMN01779583	ovary	NA	NA	WT	wK	NA	NA
SRR609667	Drosophila melanogaster	SAMN01797298	OSC	NA	NA	WT	NA	NA	NA
SRR609694	Drosophila melanogaster	SAMN01797325	ovary	5-6d	female	flam	flamOR(P)	NA	NA
SRR609695	Drosophila melanogaster	SAMN01797326	ovary	5-6d	female	flam	flamRev(R)	NA	NA
SRR618933	Drosophila melanogaster	SAMN01817915	ovary	NA	female	WT	IN1AB/FM6	NA	NA
SRR618934	Drosophila simulans	SAMN01817916	ovary	NA	female	WT	w501	NA	NA
SRR638714	Drosophila melanogaster	SAMN01832060	DL1	NA	NA	Vesicular Stomatitis Virus	NA	NA	NA
SRR638715	Drosophila melanogaster	SAMN01832061	DL1	NA	NA	Vesicular Stomatitis Virus	NA	NA	NA
SRR638716	Drosophila melanogaster	SAMN01832062	DL1	NA	NA	Vesicular Stomatitis Virus	NA	NA	NA
SRR638717	Drosophila melanogaster	SAMN01832063	DL1	NA	NA	Vesicular Stomatitis Virus	NA	NA	NA
SRR638718	Drosophila melanogaster	SAMN01832064	DL1	NA	NA	Vesicular Stomatitis Virus	NA	NA	NA
SRR638719	Drosophila melanogaster	SAMN01832065	DL1	NA	NA	Vesicular Stomatitis Virus	NA	NA	NA
SRR638720	Drosophila melanogaster	SAMN01832066	DL1	NA	NA	Rift Valley Fever Virus	NA	NA	NA
SRR638721	Drosophila melanogaster	SAMN01832067	DL1	NA	NA	Rift Valley Fever Virus	NA	NA	NA
SRR638722	Drosophila melanogaster	SAMN01832068	DL1	NA	NA	Rift Valley Fever Virus	NA	NA	NA
SRR638723	Drosophila melanogaster	SAMN01832069	DL1	NA	NA	Rift Valley Fever Virus	NA	NA	NA
SRR638724	Drosophila melanogaster	SAMN01832070	DL1	NA	NA	Rift Valley Fever Virus	NA	NA	NA
SRR638725	Drosophila melanogaster	SAMN01832071	DL1	NA	NA	Rift Valley Fever Virus	NA	NA	NA
SRR638726	Drosophila melanogaster	SAMN01832072	DL1	NA	NA	Drosophila C virus	NA	NA	NA
SRR638727	Drosophila melanogaster	SAMN01832073	DL1	NA	NA	Drosophila C virus	NA	NA	NA
SRR638728	Drosophila melanogaster	SAMN01832074	DL1	NA	NA	Drosophila C virus	NA	NA	NA
SRR638729	Drosophila melanogaster	SAMN01832075	DL1	NA	NA	Drosophila C virus	NA	NA	NA
SRR638730	Drosophila melanogaster	SAMN01832076	DL1	NA	NA	Drosophila C virus	NA	NA	NA
SRR638731	Drosophila melanogaster	SAMN01832077	DL1	NA	NA	Drosophila C virus	NA	NA	NA
SRR638732	Drosophila melanogaster	SAMN01832078	DL1	NA	NA	WT	NA	NA	NA
SRR638733	Drosophila melanogaster	SAMN01832079	DL1	NA	NA	Vaccinia virus	NA	NA	NA
SRR638734	Drosophila melanogaster	SAMN01832080	DL1	NA	NA	Vaccinia virus	NA	NA	NA
SRR638735	Drosophila melanogaster	SAMN01832081	DL1	NA	NA	Vaccinia virus	NA	NA	NA
SRR638736	Drosophila melanogaster	SAMN01832082	DL1	NA	NA	Vaccinia virus	NA	NA	NA
SRR638737	Drosophila melanogaster	SAMN01832083	DL1	NA	NA	Vaccinia virus	NA	NA	NA
SRR638738	Drosophila melanogaster	SAMN01832084	DL1	NA	NA	Vaccinia virus	NA	NA	NA
SRR682416	Drosophila melanogaster	SAMN00828792	S2	S2p	NA	WT	NA	NA	NA
SRR682425	Drosophila melanogaster	SAMN00828792	S2	S2p	NA	WT	NA	NA	NA
SRR768820	Drosophila melanogaster	SAMN01940793	S2	S2-R	NA	WT	NA	NA	AGO1
SRR768821	Drosophila melanogaster	SAMN01940793	S2	S2-R	NA	WT	NA	NA	AGO2
SRR823324	Drosophila melanogaster	SAMN02010577	OSC	NA	NA	WT	RNAi gfp	NA	NA
SRR823325	Drosophila melanogaster	SAMN02010578	OSC	NA	NA	CG2183	RNAi CG2183	NA	NA
SRR823326	Drosophila melanogaster	SAMN02010579	ovary	5-6d	female	ectopic dcr-2	UAS-Dcr-2;NGT;nanosGAL4>w-	NA	NA
SRR823327	Drosophila melanogaster	SAMN02010580	ovary	5-6d	female	CG2183; ectopic dcr-2	UAS-Dcr-2;NGT;nanosGAL4>CG2183 RNAi	NA	NA
SRR826250	Drosophila melanogaster	SAMN02045147	ovary	NA	female	DGRC204406	het	NA	NA
SRR826251	Drosophila melanogaster	SAMN02045148	ovary	NA	female	DGRC204406	hom	NA	NA
SRR826252	Drosophila melanogaster	SAMN02045149	ovary	NA	female	CG3893	tj driven VDRC GD40480	NA	NA
SRR826253	Drosophila melanogaster	SAMN02045150	ovary	NA	female	armi	tj driven VDRC KK103589	NA	NA
SRR826254	Drosophila melanogaster	SAMN02045151	ovary	NA	female	aub	tj driven VDRC KK101252	NA	NA
SRR826255	Drosophila melanogaster	SAMN02045152	ovary	NA	female	aub	tj driven VDRC KK101252	NA	NA
SRR826256	Drosophila melanogaster	SAMN02045153	ovary	NA	female	lin52	tj driven VDRC KK108404	NA	NA
SRR826257	Drosophila melanogaster	SAMN02045154	ovary	NA	female	mael	tj driven VDRC KK100907	NA	NA
SRR826258	Drosophila melanogaster	SAMN02045155	ovary	NA	female	nxt1	tj driven VDRC KK103146	NA	NA
SRR826259	Drosophila melanogaster	SAMN02045156	ovary	NA	female	uba2	tj driven VDRC KK110173	NA	NA
SRR826260	Drosophila melanogaster	SAMN02045157	ovary	NA	female	wde	tj driven VDRC KK105719	NA	NA
SRR826261	Drosophila melanogaster	SAMN02045158	ovary	NA	female	WT	tj driven VDRC GD30033	NA	NA
SRR827714	Drosophila melanogaster	SAMN02046483	ovary	NA	female	WT	nos driven w	NA	NA
SRR827715	Drosophila melanogaster	SAMN02046484	ovary	NA	female	yb	nos driven	NA	NA
SRR827716	Drosophila melanogaster	SAMN02046485	ovary	NA	female	armi	nos driven	NA	NA
SRR827717	Drosophila melanogaster	SAMN02046486	ovary	NA	female	gasz	nos driven	NA	NA
SRR827718	Drosophila melanogaster	SAMN02046487	ovary	NA	female	spnE	nos driven	NA	NA
SRR827719	Drosophila melanogaster	SAMN02046488	ovary	NA	female	aub	nos driven	NA	NA
SRR827720	Drosophila melanogaster	SAMN02046489	ovary	NA	female	del	nos driven	NA	NA
SRR827721	Drosophila melanogaster	SAMN02046490	ovary	NA	female	WT	tj driven w	NA	NA
SRR827722	Drosophila melanogaster	SAMN02046491	ovary	NA	female	yb	tj driven	NA	NA
SRR827723	Drosophila melanogaster	SAMN02046492	ovary	NA	female	armi	tj driven	NA	NA
SRR827724	Drosophila melanogaster	SAMN02046493	ovary	NA	female	gasz	tj driven	NA	NA
SRR827725	Drosophila melanogaster	SAMN02046494	ovary	NA	female	spnE	tj driven	NA	NA
SRR827726	Drosophila melanogaster	SAMN02046495	ovary	NA	female	zuc	tj driven	NA	NA
SRR827770	Drosophila melanogaster	SAMN02046522	ovary	NA	female	WT	y[1]; cn[1] bw[1] sp[1]	NA	NA
SRR835451	Drosophila melanogaster	SAMN02058429	ovary	3-5d	female	CG5508	het	NA	NA
SRR835452	Drosophila melanogaster	SAMN02058430	ovary	3-5d	female	CG5508	homo	NA	NA
SRR891254	Drosophila melanogaster	SAMN02192697	ovary	NA	female	WT	cn bw	NA	NA
SRR891255	Drosophila melanogaster	SAMN02192698	ovary	NA	female	WT	cn bw	NA	NA
SRR891256	Drosophila melanogaster	SAMN02192699	ovary	NA	female	cuff	cuffwm25	NA	NA
SRR891257	Drosophila melanogaster	SAMN02192700	ovary	NA	female	cuff	cuffwm25	NA	NA
SRR891294	Drosophila melanogaster	SAMN02192770	ovary	2-4d	female	WT	NA	NA	NA
SRR891295	Drosophila melanogaster	SAMN02192770	ovary	2-4d	female	WT	NA	NA	NA
SRR891296	Drosophila melanogaster	SAMN02192770	ovary	2-4d	female	WT	NA	NA	NA
SRR891297	Drosophila melanogaster	SAMN02192770	ovary	2-4d	female	WT	NA	NA	NA
SRR891298	Drosophila melanogaster	SAMN02192770	ovary	2-4d	female	WT	NA	NA	NA
SRR927160	Drosophila melanogaster	SAMN02228212	ovary	5-6d	female	Gtsf1	hom	NA	NA
SRR927161	Drosophila melanogaster	SAMN02228211	ovary	5-6d	female	Gtsf1	het	NA	NA
SRR954952	Drosophila melanogaster	SAMN02324144	ovary	4-7d	female	WT	5905	NA	NA
SRR954953	Drosophila melanogaster	SAMN02324146	ovary	4-7d	female	nbr	het	NA	NA
SRR954954	Drosophila melanogaster	SAMN02324145	ovary	4-7d	female	nbr	hom	NA	NA
SRR954955	Drosophila melanogaster	SAMN02324147	ovary	4-7d	female	nbr rescued	nbr null; pCaSper-nbr (WT)	NA	NA
SRR954956	Drosophila melanogaster	SAMN02324148	ovary	4-7d	female	nbr	nbr null; pCaSper-nbr (D435A,E437A)	NA	NA
